# Supplementary material
Source: publisher figshare collection journal article supplement (https://tandf.figshare.com/ndownloader/files/26648932)
Supplement: Supplementary file 1 [file 26648932]

## Sheet: ES
ELECTRONIC SUPPLEMENT
for the article
Paleocene to Miocene migmatization and kinematics of the deformation at the northern boundary of the Xolapa Complex: implications for the Chortís Block-southern México conection
by
Alicia Sarmiento-Villagrana1, Ricardo Vega-Granillo2*, Oscar Talavera-Mendoza1, Joaquín Ruiz3, Sergio Adrián Salgado Souto1

## Sheet: SF1
Sample ID	Latitude	Longitude	Locality	Petrography	Geological relationship	Zircon and CL image descriptions
	(N)	(W)
Tierra Colorada area northwestern Xolapa Complex
PO153	17° 8' 58.4"	99° 27' 16.3"	East of Tierra Colorada	Is a coarse-grained mylonitic biotite–muscovite augen gneiss with well-developed foliation, stretch lineation, and abundant kinematic indicators	Mylonitic Augen gneisses are in tectonic contact through a sub-vertical shear zone with the garnet-chloritoid-muscovite schist of the Acatlán Complex	CL images show prismatic and bipyramidal zircons (100-200 µm long) with rounded and resorbed embayment cores surrounded by oscillatory zoning. Some zircons show diffuse internal structure and thin high luminescent metamorphic rims
PO186	17° 9' 29.2"	99° 22' 34.6"	North of Tlayolapa town	Is a coarse-grained mylonitic biotite–muscovite augen gneiss with well-developed foliation simillar to sample PO153	Mylonitic augen gneisses structurally underlie andalusite-garnet two-mica schists of the Acatlán Complex. This lithologic unit is cut by megacrystic granite (sample P0188)	The zircons are short to long (100–300 µm) with prismatic and bipyramidal faces
PO160	17° 8' 56.23"	99° 36' 20.8	El Salitre town	Is a foliated coarse-grained muscovite-garnet leucogranite	El Salitre Granite contains xenoliths of staurolite-Kyanite-garnet schist. Also, a pegmatitic dike swarm with similar mineralogy intrudes the granite	Scarce 100 to 200 µm long prismatic zircons were obtained from the El Salitre Granite
PO154	17° 8' 59.2"	99° 24' 47.5"	SE of Tierra Colorada	Is a coarse-grained poorly foliated to non-foliated biotite-muscovite granite	Amatlán Granite is cutting to the Jurassic orthogneisses	Zircons are 100 to 250 µm long prismatic and bipyramidal crystals with oscillatory internal structure, and some with partially erased structure
PO188	17° 9' 29.2"	99° 22' 34.6"	North of Tlayolapa town	Is a mylonitic and cataclastic muscovite–biotite granite. K-feldspars are surrounded by dynamic recrystallization	Amatlán Granite outcrops 10 m from the contact between Xolapa-Acatlán complexes. This body intrudes to the Jurassic augen gneisses and low-grade metasedimentary rocks of Acatlán Complex.	The sample contains bipyramidal short to long (100–250 µm) zircons
San Luis Acatlán area central Xolapa Complex
PO413	98°41' 34.5"	16° 48' 56.3"	NE of San Luis Acatlán	Is a medium-grained folded quartz–feldspathic paramigmatite with stromatic bands	Paramigmatites (PO413) outcrop as a large schollen enclosed by granitic diatexites (PO412)	Zircons are short ovoid and rounded grains (˂200 µm long); most zircons have complex internal structures, with diffuse and partly resorbed cores. A few grains display thin high-luminescence rims or patchy recrystallization that may represent overgrowths during a later thermal event
PO323	98°44' 29.4"	16°48' 4.8"	San Luis Acatlán town	Is a coarse-grained plagioclase–amphibole-biotite-clinopiroxene diatexite (neosome) with gneissic foliation	Diatexites developed gneissic foliation but near of the boundary between Xolapa-Aclatlan, these rocks developed mylonitic foliation.	The sample contains prismatic and bipyramidal zircon grains ˂300 µm long
PO411	98° 42' 52.9"	16° 48' 35.5"	East of San Luis Acatlán	Is a leucocratic diatexite (neosome) with well-developed gneissic foliation composed of quartz–K-feldspar–plagioclase–biotite	Gneissic diatexite contains schollen of amphibolites and metasediments	The CL images display zircons (˂400 µm long) with oscillatory structure. However, some crystals have either prismatic or partly resorbed irregular cores. Some zircons show high-luminescence thin rims or patchy
PO412	98° 41' 34.5"	16° 48' 56.3"	NE of San Luis Acatlán	Is a coarse-grained quartz–K-feldspar–plagioclase–biotite diatexite (neosome)	Diatexites show schlieren structures and these rocks encloses schollen paramigmates (PO413)	In general, CL images display prismatic and bypiramidal 225 µm long zircons with zoned and partially resorbed internal structure
PO315	98° 44' 16.5"	16° 49' 23.3"	North of San Luis Acatlán	Is a mylonitic granite composed of K-feldspar porphyroclasts (up to 1.7 cm) surrounded by dynamically recrystallized quartz, feldspar, plagioclase, and biotite	The mylonitic granite is cutting the low-grade metasedimentary rocks of the Acatlán Complex, and is structurally over the diatexites	The zircon grains are prismatic and are 200 µm long. CL images display two types of zircons: (1) long and short prismatic zircon with ovoid cores and diffuse internal structure and, (2) metamict zircons with low-luminescence resorbed cores
PO409	98° 42' 44.4"	16° 49' 58.9"	NE of the San Luis Acatlán	Is a cataclastic and brecciated quartz–K-feldspar–hornblende–biotite granitoid	The granitoid is structurally underlaying low-grade metasedimentary rocks of Acatlán Complex and overlaying diatexites and muscovite granites of Xolapa Complex	CL images show short to long prismatic zircons (100-200 µm) with oscillatory internal structure typical of igneous zircons
PO427	98° 43' 58.1"	16° 57' 15.9"	N of San Luis Acatlán	Is an unfoliated hornblende–biotite-bearing granitoid	The granitic body is intruding the Acatlán Complex	CL images show short to long prismatic zircons (˂250 µm long) with oscillatory magmatic zoning typical of igneous zircons
Puerto Escondido-Puerto Angel area southeastern Xolapa Complex
PO216	96° 29' 28.5"	15° 39' 48.6"	Puerto Angel Bay, Oaxaca	Is a foliated amphibolitic neosome (diatexite) composed of plagioclase, amphibole, biotite, quartz and clinopiroxene	Diatexites cointains blocks of restites composed of plagioclase, biotite, amphibole, clinopiroxene, and garnet	Zircon grains are prismatic, ovoid and 100 to 300 µm long. They show low-luminescence cores with resorbed embayments, diffuse internal structure, and high-luminescence thin rims
PO223	96° 57' 46.7"	15° 50' 9.2"	SE of Puerto Escondido, Oaxaca	Is a medium-grained poorly foliated leucogranite composed of quartz, K-feldspathic and plagioclase	The leucogranite cuts breccia-structured migmatites with sharp-edged blocks of garnet-clinopiroxene granulites	Zircons from this sample occur as bipyramidal and prismatic crystals 100 to 200 µm long.
PO219	96° 29' 28.5"	15°39'50.1"	Puerto Angel Bay, Oaxaca	Is a poorly foliated coarse-grained plagioclase, biotite and quartz dike	The granitic dike cuts the amphibolitic neosome (PO216)	CL images show short to long (120 to 300 µm long) prismatic and bipyramidal zircons, with low-luminescence inherited cores, and some with erased internal structure

## Sheet: SF2
Sample							Isotope ratios						Apparent ages (Ma)
PO153	U	206Pb	U/Th	206Pb*	±	207Pb*	±	206Pb*	±	error	206Pb*	±	207Pb*	±	206Pb*	±	Best age	±
14Q 99°27'16.3"O 17° 8'58.4"N
	(ppm)	204Pb		207Pb*	(%)	235U*	(%)	238U	(%)	corr.	238U*	(Ma)	235U	(Ma)	207Pb*	(Ma)	(Ma)	(Ma)
PO153-1C	595.784	5244	6.97548	20.2336	3.42912	0.178927	3.96974	0.0262572	2	0.503811	167.08	3.29868	167.137	6.11767	167.91	80.1233	167.08	3.29868
PO153-2R	209.892	2944	2.99934	19.9181	8.19579	0.196758	8.25657	0.0284236	1	0.121116	180.675	1.78167	182.379	13.7842	204.5	190.446	180.675	1.78167
PO153-4R	558.203	6126	6.44867	19.9527	1.79151	0.18797	2.21348	0.0272012	1.3	0.58731	173.008	2.21919	174.895	3.55623	200.474	41.6031	173.008	2.21919
PO153-3C	476.088	5992	5.38402	20.666	5.41341	0.183794	6.15547	0.0275477	2.93	0.475999	175.182	5.06371	171.32	9.70419	118.296	127.676	175.182	5.06371
PO153-5C	1022.62	25628	25.6082	15.0615	2.47194	0.492452	3.09355	0.0537938	1.86	0.60125	337.771	6.1208	406.58	10.3649	818.81	51.6452	337.771	6.1208
PO153-6C	220.227	3402	1.93484	21.0467	10.0171	0.189074	10.0669	0.0288612	1	0.0993353	183.417	1.80833	175.839	16.255	75.0831	238.546	183.417	1.80833
PO153-7R	525.251	7602	15.8752	20.6268	3.4934	0.179623	3.63371	0.0268715	1	0.275201	170.938	1.68692	167.736	5.61828	122.767	82.309	170.938	1.68692
PO153-8C	84.4214	7844	3.06234	12.7168	3.52641	1.52853	6.52501	0.140978	5.49	0.841379	850.188	43.7291	941.909	40.0721	1162.98	69.9154	1162.98	69.9154
PO153-9C	238.949	2658	3.56557	19.2224	18.167	0.194048	18.3248	0.027053	2.4	0.13097	172.078	4.07523	180.077	30.2472	286.379	418.348	172.078	4.07523
PO153-10R	297.986	2844	2.88407	19.2864	9.93813	0.192502	10.1088	0.0269268	1.85	0.183008	171.286	3.12706	178.762	16.5709	278.776	228.006	171.286	3.12706
PO153-11C	108.081	9444	3.12659	14.5929	2.82669	1.29279	3.65686	0.136825	2.32	0.634425	826.683	18.0003	842.532	20.9393	884.507	58.4504	826.683	18.0003
PO153-12R	677.558	11090	10.4039	18.6288	2.02088	0.228766	2.25476	0.0309083	1	0.443506	196.231	1.93274	209.179	4.26241	357.642	45.6219	196.231	1.93274
PO153-13C	107.329	7452	4.94801	14.7166	4.60674	0.718625	6.96207	0.0767022	5.22	0.749777	476.408	23.9719	549.855	29.5674	867.03	95.5489	476.408	23.9719
PO153-14C	254.46	2316	2.11277	19.1313	8.18399	0.158235	8.38392	0.0219557	1.82	0.217082	140.004	2.5206	149.157	11.6306	297.232	187.012	140.004	2.5206
PO153-15R	261.754	4394	1.64447	20.73	7.77214	0.166437	7.99864	0.0250235	1.89	0.23629	159.327	2.97437	156.322	11.5892	110.993	183.687	159.327	2.97437
PO153-16C	237.036	3280	3.58347	21.0531	9.61777	0.173269	9.72946	0.0264568	1.47	0.151088	168.334	2.44249	162.252	14.5906	74.3566	229.051	168.334	2.44249
PO153-17R	163.974	2380	2.27104	21.3045	7.95707	0.172558	8.12634	0.0266628	1.65	0.203043	169.628	2.76236	161.637	12.1436	46.0701	190.38	169.628	2.76236
PO153-18C	186.472	2438	2.31846	20.1609	8.49733	0.196211	8.55597	0.0286901	1	0.116878	182.345	1.7979	181.915	14.2509	176.309	198.472	182.345	1.7979
PO153-19R	184.542	2110	3.02343	19.2238	13.9076	0.201186	13.9435	0.0280501	1	0.0717181	178.333	1.75889	186.129	23.7174	286.221	319.315	178.333	1.75889
PO153-20T	229.178	1102	1.01655	16.664	13.5244	0.218684	13.6211	0.0264299	1.62	0.118933	168.166	2.68906	200.814	24.8231	603.898	293.845	168.166	2.68906
PO153-21C	245.851	2452	2.25038	19.4031	7.31848	0.197415	7.38648	0.0277813	1	0.135383	176.647	1.74249	182.937	12.3659	264.947	168.157	176.647	1.74249
PO153-22R	91.2715	354	2.3003	9.05301	16.4733	0.496425	16.7497	0.0325946	3.03002	0.1809	206.766	6.16566	409.279	56.4785	1806.99	301.576	1806.99	301.576
PO153-24R	607.452	5406	3.13912	18.8921	5.64551	0.197005	5.82874	0.0269933	1.45	0.248767	171.703	2.45682	182.589	9.7409	325.868	128.25	171.703	2.45682
PO153-25C	1304.28	9578	5.37987	20.3724	4.09555	0.179311	4.21586	0.026494	1	0.237199	168.568	1.66383	167.468	6.5088	151.921	95.9864	168.568	1.66383
PO153-26C	133.551	2058	2.09254	23.8304	17.4339	0.153162	17.5575	0.0264717	2.08	0.118468	168.428	3.45793	144.7	23.6828	-228.769	442.076	168.428	3.45793
PO153-27R	115.751	1018	2.21215	18.2766	12.7411	0.198985	12.8449	0.0263763	1.63	0.126899	167.829	2.70031	184.267	21.6488	400.563	286.478	167.829	2.70031
PO153-28C	220.996	3914	2.01439	21.2772	9.47686	0.192052	9.52947	0.0296369	1	0.104938	188.275	1.85553	178.379	15.5904	49.1346	226.742	188.275	1.85553
PO153-29R	360.85	5526	2.00165	20.1006	7.67056	0.197948	7.73547	0.0288574	1	0.129275	183.393	1.80809	183.388	12.9793	183.299	178.9	183.393	1.80809
PO153-30C	255.929	2004	2.0151	16.8825	24.311	0.195313	24.3316	0.0239147	1	0.041099	152.35	1.50564	181.152	40.3904	575.651	535.783	152.35	1.50564
PO153-31C	770.179	5434	5.21447	17.8746	7.6968	0.198858	7.99685	0.0257797	2.17	0.271357	164.081	3.51562	184.16	13.4695	450.179	171.18	164.081	3.51562
PO153-32R	962.015	5832	4.63597	17.5777	11.7488	0.211031	11.8367	0.0269033	1.44	0.121656	171.138	2.43196	194.417	20.9465	487.266	260.088	171.138	2.43196
PO153-33C	371.868	4882	5.42892	19.6172	5.55539	0.202866	5.70547	0.0288632	1.3	0.227851	183.43	2.35098	187.548	9.77073	239.711	128.167	183.43	2.35098
PO153-34R	412.934	3562	5.50298	18.4065	8.31704	0.206621	8.40897	0.0275832	1.24	0.147462	175.404	2.14569	190.713	14.622	384.681	187.139	175.404	2.14569
PO153-35C	360.559	2078	3.81826	17.2833	3.61466	0.231324	3.75043	0.0289967	1	0.266636	184.266	1.81657	211.291	7.1543	524.413	79.2901	184.266	1.81657
PO153-36C	646.776	13912	2.29363	20.3874	3.62307	0.191213	3.75854	0.0282734	1	0.266061	179.733	1.77251	177.664	6.12608	150.196	84.9331	179.733	1.77251
PO153-37R	1100.01	15208	2.44557	19.8834	3.10504	0.177687	5.9197	0.0256239	5.04	0.851394	163.102	8.1172	166.068	9.06916	208.54	72.0092	163.102	8.1172
PO153-38C	260.986	540	1.17766	11.0313	6.55764	0.349163	7.12648	0.0279354	2.79	0.391498	177.614	4.88778	304.091	18.7292	1439.26	125.139	177.614	4.88778
PO153-39R	220.774	6824	2.21226	20.2361	16.4367	0.179252	16.7358	0.0263081	3.15	0.188219	167.401	5.20524	167.417	25.8362	167.628	386.199	167.401	5.20524
PO153-40C	259.089	16554	3.98772	14.9234	1.82787	0.702067	3.00885	0.0759878	2.39	0.794323	472.13	10.8806	540.024	12.6025	838.036	38.0699	472.13	10.8806
PO153-41C	983.949	10180	2.26553	18.9344	4.30544	0.205017	4.42005	0.0281539	1	0.226242	178.984	1.76522	189.362	7.63592	320.793	97.8675	178.984	1.76522
PO153-42R	1003.17	17434	9.51393	20.4063	4.63525	0.187168	4.76168	0.027701	1.09	0.228911	176.144	1.89397	174.21	7.62286	148.02	108.725	176.144	1.89397
PO153-43C	339.702	5066	0.821802	20.7444	9.01789	0.179295	9.11544	0.0269753	1.33	0.145906	171.59	2.25204	167.454	14.0728	109.362	213.315	171.59	2.25204
PO153-44R	153.708	4254	1.69278	20.133	7.81146	0.197104	7.91564	0.0287808	1.28	0.161705	182.913	2.30839	182.673	13.2344	179.537	182.32	182.913	2.30839
PO153-45C	150.445	6112	2.18414	22.451	20.0963	0.167317	20.127	0.0272442	1.11	0.0551499	173.277	1.89776	157.087	29.3008	-80.6729	496.138	173.277	1.89776
PO153-46C	585.962	6178	8.33379	17.6381	13.9249	0.212762	14.0165	0.0272172	1.6	0.114151	173.108	2.73287	195.868	24.9732	479.689	309.054	173.108	2.73287
PO153-47R	509.809	8238	9.88308	19.2931	5.7355	0.196749	5.82203	0.0275305	1	0.171762	175.074	1.72718	182.372	9.71913	277.982	131.417	175.074	1.72718
PO153-48C	129.792	12622	2.09661	15.1521	3.59152	1.19576	4.78379	0.131406	3.16	0.660565	795.884	23.6595	798.627	26.4581	806.272	75.1998	795.884	23.6595
PO153-49C	286.011	35638	4.69765	14.3465	2.61225	1.20973	2.94507	0.125873	1.36	0.461788	764.277	9.80166	805.066	16.3724	919.615	53.7188	764.277	9.80166
PO153-50C	484.561	10170	6.61057	20.217	4.43499	0.20558	5.21313	0.0301437	2.74	0.525596	191.448	5.16854	189.837	9.02663	169.83	103.605	191.448	5.16854
Sample							Isotope ratios						Apparent ages (Ma)
PO186	U	206Pb	U/Th	206Pb*	±	207Pb*	±	206Pb*	±	error	206Pb*	±	207Pb*	±	206Pb*	±	Best age	±
14Q 99°22'34.6"O 17° 9'29.2"N
	(ppm)	204Pb		207Pb*	(%)	235U*	(%)	238U	(%)	corr.	238U*	(Ma)	235U	(Ma)	207Pb*	(Ma)	(Ma)	(Ma)
PO186-1C	326.557	3117	1.66206	20.1794	5.72527	0.192775	5.81195	0.0282135	1	0.17206	179.358	1.76886	178.994	9.53797	174.17	133.68	179.358	1.76886
PO186-2R	942.695	5714	7.16384	20.8688	3.12282	0.164386	3.43884	0.0248807	1.44	0.418746	158.429	2.25357	154.535	4.92963	95.2165	73.9516	158.429	2.25357
PO186-3C	851.36	18285	19.5852	15.9234	3.32941	0.377181	4.63178	0.0435595	3.22	0.695197	274.859	8.66444	324.962	12.8813	701.471	70.9017	274.859	8.66444
PO186-4R	1611.27	13556	8.62601	20.4796	1.32108	0.175144	3.36056	0.0260144	3.09	0.91949	165.556	5.05054	163.873	5.08567	139.608	31.0223	165.556	5.05054
PO186-5R	1784.4	3709	5.40094	20.3926	4.88636	0.17551	5.3795	0.0259581	2.25	0.418255	165.201	3.66981	164.19	8.15561	149.601	114.587	165.201	3.66981
PO186-6C	130.966	826	1.63002	20.3164	4.91682	0.210889	5.28938	0.0310742	1.95	0.368664	197.268	3.78847	194.299	9.354	158.365	115.115	197.268	3.78847
PO186-7R	283.92	1077	4.79576	19.77	7.06283	0.199885	7.16913	0.0286606	1.23001	0.17157	182.16	2.20923	185.029	12.1271	221.791	163.543	182.16	2.20923
PO186-8C	149.383	4097	3.07612	19.9942	11.2167	0.226436	11.2612	0.0328359	1.00001	0.0888009	208.273	2.04945	207.253	21.1144	195.646	261.381	208.273	2.04945
PO186-9R	254.015	4348	4.5381	20.4704	6.60528	0.197865	8.0321	0.0293761	4.57	0.568967	186.643	8.40728	183.318	13.4724	140.662	155.21	186.643	8.40728
PO186-10C	949.789	7178	21.6458	20.5259	2.37145	0.179645	2.61838	0.0267434	1.11	0.423927	170.134	1.86379	167.755	4.04881	134.301	55.7464	170.134	1.86379
PO186-11C	723.777	15663	6.39261	19.3958	8.41999	0.196015	9.06194	0.0275738	3.35	0.369678	175.345	5.7949	181.749	15.0812	265.814	193.51	175.345	5.7949
PO186-12R	413.64	51241	12.6698	19.1603	5.77249	0.215662	6.29857	0.0299691	2.52	0.400091	190.355	4.72682	198.293	11.3462	293.782	131.893	190.355	4.72682
PO186-14C	217.274	31267	2.25395	12.387	3.06453	2.38106	3.22356	0.213912	1	0.310217	1249.62	11.3597	1236.93	23.0546	1214.86	60.2983	1214.86	60.2983
PO186-15R	894.091	12327	5.81064	16.2454	3.33822	0.359728	9.14133	0.0423842	8.51	0.930937	267.595	22.3062	312.012	24.561	658.69	71.5901	267.595	22.3062
PO186-16C	980.164	3353	1.22659	20.7026	4.14641	0.187344	5.07716	0.0281296	2.93	0.577094	178.831	5.16775	174.361	8.13437	114.122	97.8616	178.831	5.16775
PO186-17C	495.391	2108	4.15042	21.0373	10.2581	0.180676	10.9118	0.027567	3.72	0.340915	175.303	6.43341	168.642	16.9565	76.1476	244.284	175.303	6.43341
PO186-18R	532.226	4635	12.9623	20.9825	4.6787	0.175808	5.28135	0.0267544	2.45	0.463896	170.203	4.1154	164.447	8.01837	82.3378	111.088	170.203	4.1154
PO186-19C	271.305	2117	2.56079	21.0057	8.894	0.179237	9.72359	0.0273063	3.93	0.404172	173.667	6.73402	167.404	15.0077	79.7191	211.517	173.667	6.73402
PO186-20R	393.86	570	3.31748	18.7317	10.5973	0.20052	10.672	0.0272417	1.26003	0.11807	173.262	2.15408	185.566	18.1012	345.187	240.342	173.262	2.15408
PO186-22C	438.847	1118	1.56499	15.9745	15.8542	0.424651	16.2446	0.0491994	3.54001	0.217919	309.604	10.701	359.372	49.2041	694.636	339.878	309.604	10.701
PO186-23R	1288.26	3810	30.53	19.111	2.93293	0.184922	4.03423	0.0256313	2.77	0.686625	163.148	4.4625	172.287	6.39286	299.655	66.9057	163.148	4.4625
PO186-25R	700.332	34448	12.932	16.3636	3.98084	0.34732	5.5659	0.0412201	3.89	0.698899	260.391	9.92738	302.704	14.5698	643.128	85.6009	260.391	9.92738
PO186-24C	105.524	19686	2.47942	13.7306	2.38922	1.64032	4.14734	0.163349	3.39	0.817391	975.361	30.6851	985.836	26.1679	1009.21	48.4598	1009.21	48.4598
PO186-26C	244.501	14613	2.13804	17.3483	5.79905	0.570109	6.10238	0.0717319	1.9	0.311354	446.581	8.19782	458.085	22.5024	516.187	127.444	446.581	8.19782
PO186-27R	198.316	6435	5.07146	20.9119	4.11291	0.192519	6.43572	0.0291987	4.95	0.769145	185.532	9.05292	178.776	10.5499	90.3365	97.5002	185.532	9.05292
PO186-29R	786.57	18802	22.3785	20.4007	3.04229	0.183455	4.37208	0.0271441	3.14	0.718193	172.649	5.34923	171.03	6.88183	148.663	71.3323	172.649	5.34923
PO186-28C	502.65	32167	7.90171	20.6924	3.7317	0.188561	4.28692	0.0282984	2.11	0.492195	179.89	3.7432	175.401	6.90578	115.281	88.0489	179.89	3.7432
PO186-30C	337.363	8067	10.9431	20.6574	9.56888	0.191584	9.82757	0.0287034	2.24	0.22793	182.428	4.02911	177.98	16.0453	119.278	225.983	182.428	4.02911
PO186-31R	370.251	7727	13.2402	20.0973	9.24965	0.185791	9.30355	0.0270808	1	0.107486	172.252	1.69971	173.032	14.8022	183.682	215.816	172.252	1.69971
PO186-31C	84.8282	5416	1.89977	19.9137	9.86645	0.182293	10.735	0.0263282	4.23	0.394039	167.526	6.99509	170.032	16.808	205.015	229.372	167.526	6.99509
PO186-32C	63.9912	3042	1.74822	20.5468	9.95527	0.202801	10.6774	0.0302214	3.86	0.361511	191.934	7.29944	187.494	18.2818	131.91	234.596	191.934	7.29944
PO186-33R	635.66	18034	8.2769	19.8605	6.14681	0.193255	6.35164	0.0278369	1.6	0.251904	176.996	2.79341	179.403	10.4455	211.211	142.569	176.996	2.79341
PO186-34R	1141.72	24716	22.6616	20.1658	2.28384	0.178212	4.02145	0.0260645	3.31	0.823087	165.87	5.42028	166.521	6.17634	175.752	53.2782	165.87	5.42028
PO186-35C	403.445	482156	4.3665	13.582	2.46009	1.6054	6.95932	0.158141	6.51	0.935436	946.436	57.3051	972.316	43.5684	1031.24	49.7315	1031.24	49.7315
PO186-36R	1101.94	6186	15.3577	20.5535	6.93346	0.178865	7.0052	0.0266631	1	0.142751	169.63	1.67418	167.084	10.7927	131.144	163.233	169.63	1.67418
PO186-37C	465.017	8410	5.07535	21.2308	6.38847	0.171112	7.58556	0.0263478	4.09	0.539183	167.65	6.76849	160.383	11.2542	54.3469	152.548	167.65	6.76849
PO186-38R	1007.88	10642	2.22191	20.3967	4.03165	0.177423	4.30867	0.0262464	1.52	0.352777	167.013	2.50599	165.841	6.5926	149.123	94.5363	167.013	2.50599
PO186-39C	242.105	66796	1.76893	9.65539	3.06083	4.12809	4.08813	0.28908	2.71	0.662895	1636.93	39.177	1659.88	33.4276	1689.03	56.4764	1689.03	56.4764
PO186-40R	344.552	17913	5.01823	11.1727	4.53355	1.05247	8.98725	0.0852836	7.76	0.863445	527.583	39.3104	730.103	46.827	1414.95	86.7514	1414.95	86.7514
PO186-41C	1471.37	32604	16.5859	19.5962	2.65459	0.197906	2.87348	0.0281275	1.1	0.382812	178.818	1.93997	183.353	4.82033	242.171	61.1853	178.818	1.93997
PO186-42R	699.298	921	7.14982	19.5063	4.00623	0.185231	4.52791	0.0262053	2.11	0.465999	166.755	3.47341	172.552	7.18533	252.76	92.1797	166.755	3.47341
PO186-43C	535.209	4414	11.2853	21.2312	5.66496	0.170473	5.92616	0.02625	1.74	0.293613	167.036	2.86909	159.829	8.76411	54.2977	135.247	167.036	2.86909
PO186-44R	1084.75	8267	15.9574	20.1552	3.83617	0.184403	3.9669	0.0269559	1.01	0.254607	171.468	1.709	171.842	6.27126	176.975	89.4911	171.468	1.709
PO186-45C	452.989	17779	4.58459	19.9078	7.48102	0.232032	7.54756	0.0335018	1	0.132493	212.428	2.08966	211.875	14.4342	205.704	173.757	212.428	2.08966
PO186-47C	233.413	643	1.62601	19.8857	9.061	0.188754	9.50769	0.0272231	2.88	0.302913	173.145	4.92021	175.566	15.33	208.272	210.474	173.145	4.92021
PO186-48R	234.564	289	2.60405	20.2387	16.9785	0.193383	17.7251	0.0283856	5.09002	0.287165	180.437	9.05692	179.511	29.1727	167.326	399.137	180.437	9.05692
PO186-46R	512.117	14106	5.41736	19.6946	2.85151	0.20311	3.75296	0.029012	2.44	0.650154	184.362	4.43471	187.754	6.43332	230.622	65.8629	184.362	4.43471
PO186-49C	751.544	17448	8.41561	19.9109	4.69357	0.176443	5.17513	0.0254796	2.18	0.421245	162.195	3.49173	164.995	7.88122	205.34	108.942	162.195	3.49173
PO186-50R	2099.7	9961	24.8133	19.4745	4.65499	0.171317	6.3575	0.0241972	4.33	0.681085	154.128	6.59458	160.561	9.44178	256.514	107.046	154.128	6.59458
PO186-51C	934.708	5542	5.22136	18.9031	5.37936	0.184338	6.39062	0.0252724	3.45	0.539854	160.892	5.48208	171.786	10.1001	324.541	122.225	160.892	5.48208
PO186-52R	2274.69	22960	46.4063	20.2802	2.6823	0.173473	3.76355	0.0255154	2.64	0.701465	162.42	4.23431	162.428	5.64925	162.532	62.7286	162.42	4.23431
PO186-53C	378.685	1314	2.25696	20.5701	9.66268	0.158619	10.532	0.0236641	4.19	0.397835	150.772	6.24403	149.494	14.6415	129.249	227.761	150.772	6.24403
PO186-54R	290.192	710	1.74372	20.5968	12	0.169505	12.2	0.025321	2.20001	0.180329	161.197	3.50238	158.989	17.9562	126.194	283.353	161.197	3.50238
PO186-55C	763.149	2786	5.09053	18.3615	6.83774	0.196304	6.91048	0.0261418	1	0.144708	166.356	1.64228	181.994	11.5145	390.175	153.629	166.356	1.64228
PO186-56R	670.004	6723	4.11478	207052827199409	6.91244	0.180091	7.19043	0.027044	1.98	0.275366	172.021	3.36097	168.138	11.1424	113.812	163.26	172.021	3.36097
PO186-57C	976.265	1960	8.01434	18.7686	10.2781	0.18715	10.5215	0.0254753	2.25	0.213848	162.168	3.60326	174.194	16.8435	340.737	233.251	162.168	3.60326
PO186-58C	336.517	13111	4.54596	20.5883	3.79292	0.188935	3.97224	0.0282119	1.18	0.297062	179.347	2.08713	175.72	6.40952	127.169	89.2967	179.347	2.08713
PO186-59R	629.387	10418	10.6148	20.6883	3.99304	0.178128	4.55417	0.0267273	2.19	0.480878	170.033	3.67504	166.448	6.99174	115.751	94.2102	170.033	3.67504
PO186-60C	214.314	2252	2.30028	20.4408	8.91222	0.172733	9.07479	0.0256078	1.71001	0.188435	163.001	2.75238	161.788	13.5728	144.059	209.435	163.001	2.75238
Sample							Isotope ratios						Apparent ages (Ma)
PO160	U	206Pb	U/Th	206Pb*	±	207Pb*	±	206Pb*	±	error	206Pb*	±	207Pb*	±	206Pb*	±	Best age	±
14Q 99°36'20.8"O 1°42'55.4"N
	(ppm)	204Pb		207Pb*	(%)	235U*	(%)	238U	(%)	corr.	238U*	(Ma)	235U	(Ma)	207Pb*	(Ma)	(Ma)	(Ma)
PO160-2	6574.29	2144.8	34.539	20.8406	5.25055	0.072565	7.96545	0.0109682	5.99	0.751998	70.3206	4.18931	71.1306	5.47202	98.4269	124.301	70.3206	4.18931
PO160-3	9978.86	2086.4	32.1983	20.4169	5.31272	0.0679299	10.6585	0.0100589	9.24	0.866918	64.5197	5.93189	66.7331	6.88412	146.805	124.661	64.5197	5.93189
PO160-4	6224.93	183.2	18.3444	21.1931	16.7884	0.0674748	17.1039	0.0103713	3.27	0.191185	66.5135	2.16381	66.3003	10.978	58.5909	402.634	66.5135	2.16381
PO160-5	6818.33	340.8	10.0518	20.716	23.9421	0.0709042	24.0305	0.0106531	2.06001	0.0857247	68.3112	1.39979	69.5571	16.1566	112.589	572.102	68.3112	1.39979
PO160-6	5390.42	423.2	56.3759	22.0954	10.2452	0.0661024	10.8659	0.010593	3.62	0.333151	67.9277	2.44607	64.994	6.84103	-41.7119	249.476	67.9277	2.44607
PO160-7	3468.33	1091.2	10.4087	21.3907	11.6554	0.0552362	14.6952	0.00856936	8.95	0.60904	55.0063	4.90212	54.5917	7.8107	36.4115	279.818	55.0063	4.90212
PO160-8	7712.91	2430.4	51.7057	21.1809	6.26524	0.0659046	6.40278	0.0101241	1.32	0.20616	64.9362	0.852855	64.8056	4.01974	59.9623	149.419	64.9362	0.852855
PO160-9	7846.07	650.4	22.0301	21.5568	12.7198	0.0650909	13.2926	0.0101766	3.86	0.290387	65.271	2.50675	64.0302	8.24867	17.8719	306.613	65.271	2.50675
PO160-10	7246.92	972.8	47.3563	21.4023	7.93658	0.0633386	8.75668	0.00983169	3.7	0.422535	63.0696	2.3222	62.3583	5.29627	35.1142	190.267	63.0696	2.3222
PO160-11	9537.25	801.6	37.5921	20.4599	20.8787	0.0483563	22.8117	0.00717554	9.19	0.402863	46.0914	4.22069	47.95	10.6844	141.873	494.726	46.0914	4.22069
PO160-12	7796.47	1116.8	25.8827	20.9772	11.4166	0.0635224	11.7941	0.00966437	2.96	0.250974	62.0014	1.82645	62.5338	7.15287	82.9372	271.648	62.0014	1.82645
PO160-13	8917.52	867.2	44.338	21.5502	12.0993	0.0650634	14.1413	0.0101692	7.32	0.517633	65.2239	4.75032	64.004	8.77186	18.6001	291.52	65.2239	4.75032
PO160-15	5477.46	1050.4	40.0168	21.2655	5.94738	0.0637178	7.01496	0.00982734	3.72	0.530295	63.0419	2.33373	62.7204	4.2667	50.4462	142.079	63.0419	2.33373
PO160-17	10127.9	900	10.677	21.0661	6.41599	0.0641266	6.589	0.00979765	1.5	0.227652	62.8523	0.938204	63.1105	4.03178	72.8921	152.667	62.8523	0.938204
PO160-19	5229.51	338.4	28.8245	21.2283	14.1674	0.0642636	14.4962	0.00989417	3.07	0.21178	63.4685	1.93892	63.2412	8.88813	54.625	339.432	63.4685	1.93892
PO160-20	10478.2	854.4	53.7949	20.8141	10.7337	0.0717869	11.1424	0.0108368	2.99	0.268344	69.4828	2.06638	70.3937	7.57798	101.43	254.462	69.4828	2.06638
PO160-22	5641.29	1127.2	36.4728	21.3574	4.49117	0.06614	4.90022	0.010245	1.96	0.399982	65.7075	1.28133	65.0299	3.08672	40.1407	107.483	65.7075	1.28133
PO160-23	336.338	1708.8	2.09058	20.4984	16.5789	0.155952	16.6091	0.0231851	1.00001	0.0602084	147.754	1.46075	147.153	22.7561	137.455	391.771	147.754	1.46075
Sample							Isotope ratios						Apparent ages (Ma)
PO154	U	206Pb	U/Th	206Pb*	±	207Pb*	±	206Pb*	±	error	206Pb*	±	207Pb*	±	206Pb*	±	Best age	±
14Q 99°24'47.5"O 17° 8'59.2"N
	(ppm)	204Pb		207Pb*	(%)	235U*	(%)	238U	(%)	corr.	238U*	(Ma)	235U	(Ma)	207Pb*	(Ma)	(Ma)	(Ma)
PO154-1C	452.54	967	1.55367	21.8755	12.9891	0.0600267	13.116	0.00952363	1.82	0.138762	61.1028	1.10682	59.1909	7.54165	-17.4671	315.257	61.1028	1.10682
PO154-2R	2373.49	4606	12.6247	21.2287	3.35606	0.0582653	3.50188	0.00897082	1	0.285561	57.5718	0.573155	57.5022	1.9577	54.5819	80.061	57.5718	0.573155
PO154-3C	496.315	11642	5.29259	15.4321	2.49458	0.695363	3.68334	0.0778277	2.71	0.735745	483.143	12.6146	536.017	15.341	767.836	52.5461	483.143	12.6146
PO154-4R	2387.39	6676	18.3554	20.8947	4.95971	0.0614106	5.49257	0.0093063	2.36	0.429671	59.7148	1.40276	60.5156	3.22676	92.2898	117.538	59.7148	1.40276
PO154-5C	636.018	1594	2.39927	21.1256	8.19321	0.0623732	8.3577	0.00955666	1.65	0.197423	61.3137	1.00688	61.436	4.98243	66.183	195.318	61.3137	1.00688
PO154-6C	417.61	1253	1.60622	17.5336	20.1641	0.212346	20.4291	0.0270031	3.28001	0.160555	171.765	5.5595	195.519	36.3482	492.799	448.702	171.765	5.5595
PO154-7R	405.645	2849	1.30689	21.3613	5.98673	0.166383	6.44246	0.0257772	2.38	0.369424	164.065	3.85547	156.275	9.33174	39.7106	143.334	164.065	3.85547
PO154-8C	1296.1	3331	2.26619	21.2219	12.1356	0.0591171	12.2279	0.00909905	1.5	0.12267	58.391	0.87191	58.3192	6.93042	55.3514	290.383	58.391	0.87191
PO154-9R	1574.96	3005	1.75177	21.2283	7.88135	0.0593353	8.09102	0.00913539	1.83	0.226177	58.6231	1.06794	58.5284	4.60167	54.6283	188.247	58.6231	1.06794
PO154-10R	2459.83	5328	2.91319	21.5886	5.81041	0.0597563	5.95406	0.00935638	1.3	0.218338	60.0347	0.776828	58.9318	3.40897	14.3203	139.751	60.0347	0.776828
PO154-11C	2548.07	5328	1.87289	21.319	2.23955	0.0573416	2.54079	0.00886614	1.2	0.472295	56.9029	0.67983	56.6156	1.39911	44.4519	53.5368	56.9029	0.67983
PO154-12R	2125.89	2596	12.2776	20.9536	5.27252	0.0617718	5.53981	0.00938745	1.7	0.30687	60.2331	1.01919	60.861	3.27254	85.6083	125.108	60.2331	1.01919
PO154-13C	643.484	4975	9.83837	16.8842	4.37746	0.299138	7.6387	0.0366312	6.26	0.819511	231.917	14.26	265.727	17.8612	575.431	95.2091	231.917	14.26
PO154-14R	3332.83	1189	13.3814	20.3561	3.3572	0.0631947	3.50584	0.00932985	1.01	0.288091	59.8653	0.60184	62.2209	2.11588	153.79	78.645	59.8653	0.60184
PO154-15C	1105.14	2580	1.66451	21.3506	8.93731	0.057184	9.02709	0.00885488	1.27	0.140688	56.831	0.718581	56.4642	4.95798	40.9084	214.128	56.831	0.718581
PO154-16C	325.354	391	2.0337	21.2249	13.3921	0.0620957	13.5916	0.00955887	2.32	0.170694	61.3278	1.41606	61.1707	8.06876	55.0081	320.666	61.3278	1.41606
PO154-17R	5830.02	3903	10.3991	21.0073	2.87753	0.0610016	3.57415	0.00929417	2.12	0.593147	59.6374	1.25848	60.1242	2.08655	79.5341	68.3401	59.6374	1.25848
PO154-19C	1018.28	974	1.50142	21.0024	8.78443	0.0596209	8.97099	0.00908166	1.82	0.202876	58.2799	1.05591	58.802	5.12533	80.0954	208.888	58.2799	1.05591
PO154-18R	547.59	1662	2.10421	21.1215	9.60286	0.0548619	9.65479	0.00840414	1	0.103576	53.9502	0.537251	54.2314	5.0986	66.6523	229.015	53.9502	0.537251
PO154-20R	1038.96	4236	3.69306	21.617	4.65845	0.0578677	5.55716	0.00907257	3.03	0.545242	58.2218	1.75618	57.1206	3.08666	11.161	112.102	58.2218	1.75618
PO154-21C	2122.88	3475	1.86812	21.6179	4.28596	0.0587817	4.42239	0.00921623	1.09	0.246473	59.1395	0.641673	57.9975	2.49301	11.0676	103.111	59.1395	0.641673
PO154-22R	5175.85	11640	9.48025	21.2135	1.59046	0.0614854	2.05416	0.00945982	1.3	0.632863	60.6953	0.785335	60.5872	1.20815	56.2961	37.9335	60.6953	0.785335
PO154-23C	573.761	322	1.60133	21.5368	6.49731	0.0590265	6.73409	0.00921992	1.77	0.262842	59.1631	1.0424	58.2323	3.81111	20.0948	156.156	59.1631	1.0424
PO154-24R	597.519	1897	1.98526	21.3091	11.7992	0.0575446	12.0348	0.00889343	2.37	0.196928	57.0773	1.34676	56.8105	6.6494	45.5521	282.804	57.0773	1.34676
PO154-25C	1184.83	1685	0.896277	21.3695	4.78722	0.0590038	4.89055	0.00914479	1	0.204476	58.6832	0.584169	58.2106	2.76676	38.7867	114.58	58.6832	0.584169
PO154-27R	1477.27	3347	6.82572	21.4754	5.51634	0.0582368	5.60625	0.00907064	1	0.178372	58.2095	0.579475	57.4748	3.13269	26.9438	132.375	58.2095	0.579475
PO154-28C	873.426	1340	1.59691	21.2406	6.76507	0.0606314	7.17817	0.00934035	2.4	0.334347	59.9323	1.43171	59.7699	4.16658	53.2452	161.59	59.9323	1.43171
PO154-29R	1063.61	1655	1.95655	21.2876	6.94459	0.0609141	7.09232	0.00940468	1.44	0.203037	60.3432	0.864887	60.0405	4.13483	47.9658	166.029	60.3432	0.864887
PO154-30C	2163.98	4366	1.60175	21.2982	2.90849	0.0597798	3.46319	0.00923415	1.88	0.542852	59.254	1.10887	58.9543	1.98356	46.7759	69.5028	59.254	1.10887
PO154-32R	1477.89	1604	2.26995	21.0179	3.79639	0.0599476	3.92589	0.00913819	1	0.254719	58.641	0.583751	59.115	2.25453	78.3377	90.1723	58.641	0.583751
PO154-34R	3389.28	6428	10.1739	21.6246	2.09875	0.0560753	2.36033	0.00879462	1.08	0.457564	56.4459	0.606955	55.3987	1.27256	10.3235	50.4717	56.4459	0.606955
PO154-35C	671.742	293	2.68299	21.175	15.6579	0.0608565	15.7436	0.00934608	1.64	0.10417	59.9689	0.978931	59.9854	9.17056	60.6215	375.083	59.9689	0.978931
PO154-36C	734.343	930	1.00869	21.3537	11.7936	0.0600544	12.0454	0.00930074	2.45	0.203398	59.6793	1.4554	59.2173	6.92904	40.5525	282.934	59.6793	1.4554
PO154-37R	1664.82	1565	0.719865	20.8944	8.25625	0.0583298	8.33874	0.00883934	1.17	0.140309	56.7317	0.660849	57.5641	4.66662	92.3141	195.865	56.7317	0.660849
PO154-39R	5403.22	4320	6.55216	20.5081	5.34782	0.0566573	5.45381	0.00842716	1.07	0.196193	54.0973	0.57642	55.9582	2.96929	136.338	125.73	54.0973	0.57642
PO154-40R	2978.29	4149	1.74992	20.9507	11.7281	0.0576504	11.7706	0.0087599	1	0.0849571	56.224	0.559796	56.912	6.51472	85.9394	278.949	56.224	0.559796
PO154-41C	1036.06	1661	1.477	21.5234	5.11658	0.0582177	5.24422	0.00908792	1.15	0.219289	58.3199	0.667654	57.4565	2.92949	21.59	122.896	58.3199	0.667654
PO154-42R	1098.71	3883	4.56179	22.4449	6.55162	0.0589274	7.27388	0.00959255	3.16	0.434431	61.5429	1.9355	58.1373	4.11008	-79.9974	160.489	61.5429	1.9355
PO154-43C	1078.25	2232	2.1199	20.924	8.66439	0.0580482	8.96447	0.00880913	2.3	0.256569	56.5386	1.2947	57.2939	4.99391	88.9572	205.682	56.5386	1.2947
PO154-44R	2223.82	6022	3.01727	21.6632	3.1382	0.0570671	3.61281	0.00896619	1.79	0.495459	57.5422	1.02542	56.3519	1.98043	6.02174	75.5718	57.5422	1.02542
PO154-45C	1822.9	8231	5.36717	22.1601	4.4508	0.0542662	5.52291	0.00872168	3.27	0.592079	55.9798	1.82261	53.6579	2.88655	-48.8287	108.324	55.9798	1.82261
Sample							Isotope ratios						Apparent ages (Ma)
PO188	U	206Pb	U/Th	206Pb*	±	207Pb*	±	206Pb*	±	error	206Pb*	±	207Pb*	±	206Pb*	±	Best age	±
14Q 99°22'34.6"O 17° 9'29.2"N
	(ppm)	204Pb		207Pb*	(%)	235U*	(%)	238U	(%)	corr.	238U*	(Ma)	235U	(Ma)	207Pb*	(Ma)	(Ma)	(Ma)
PO188-1C	1862.7	3186	3.34707	21.49	5.52244	0.0535514	5.65995	0.00834654	1.24	0.219083	53.582	0.661663	52.9692	2.92118	25.3147	132.563	53.582	0.661663
PO188-2R	3343.8	5013	9.76699	21.3886	3.27832	0.0562005	3.54161	0.00871808	1.34	0.378359	55.9568	0.746576	55.5192	1.91349	36.656	78.4711	55.9568	0.746576
PO188-3C	1316.19	4498	9.71298	20.5908	4.63362	0.0581641	6.85368	0.00868615	5.05	0.736831	55.7527	2.80337	57.4051	3.82523	126.88	109.112	55.7527	2.80337
PO188-4R	1575.02	3758	9.88499	20.8933	5.82864	0.0584542	6.6735	0.00885771	3.25	0.487001	56.849	1.83947	57.6834	3.74222	92.4443	138.171	56.849	1.83947
PO188-6R	937.422	2052	3.5068	21.3301	5.5115	0.0572637	5.8201	0.00885871	1.87	0.3213	56.8555	1.05852	56.5408	3.20079	43.2055	131.83	56.8555	1.05852
PO188-7C	339.826	3047	3.40849	20.2989	17.1428	0.187424	17.2329	0.0275929	1.76	0.10213	175.465	3.04654	174.429	27.6258	160.382	403.56	175.465	3.04654
PO188-8C	2993.63	5812	4.58362	21.5729	2.58111	0.054177	2.94112	0.00847663	1.41	0.479408	54.4136	0.764002	53.572	1.53478	16.0693	62.0357	54.4136	0.764002
PO188-9R	3150.16	1932	9.62136	20.6703	9.36091	0.0601669	9.5343	0.00901994	1.81	0.189841	57.8856	1.04304	59.3251	5.49422	117.798	221.113	57.8856	1.04304
PO188-10C	2977.84	3678	6.94118	21.4923	3.66964	0.0564915	5.58483	0.00880573	4.21	0.753828	56.5169	2.36896	55.7988	3.0322	25.0551	88.0484	56.5169	2.36896
PO188-11R	6889.84	3109	9.55309	20.7219	8.18422	0.0584521	8.43222	0.00878472	2.03	0.240743	56.3826	1.13958	57.6814	4.72829	111.922	193.436	56.3826	1.13958
PO188-12C	2946.05	15173	2.69242	20.6108	1.86668	0.13615	4.00201	0.0203522	3.54	0.884556	129.881	4.55179	129.609	4.8696	124.596	43.9575	129.881	4.55179
PO188-14C	731.45	1121	3.73146	21.0501	10.3114	0.0673203	10.8828	0.0102778	3.48	0.319771	65.9167	2.28222	66.1533	6.96993	74.6954	245.6	65.9167	2.28222
PO188-15R	1301.24	1081	2.33975	21.0929	6.82863	0.0590277	6.95886	0.00903007	1.34	0.19256	57.9503	0.773055	58.2334	3.93839	69.8683	162.58	57.9503	0.773055
PO188-16C	1629.39	3051	1.48817	20.9463	8.11786	0.0608741	8.33497	0.0092478	1.89	0.226756	59.3412	1.1164	60.0022	4.85631	86.438	192.784	59.3412	1.1164
PO188-17R	804.817	1871	4.46624	20.942	6.47618	0.0611542	6.93479	0.00928846	2.48	0.357617	59.6009	1.47129	60.2703	4.05801	86.9221	153.682	59.6009	1.47129
PO188-18C	12641.8	6983	21.7073	20.8597	2.92065	0.0645924	3.59142	0.00977212	2.09	0.581943	62.6893	1.30386	63.5549	2.21256	96.2532	69.1487	62.6893	1.30386
PO188-19R	12305.5	542	16.0714	21.28	9.31381	0.0558016	9.9962	0.00861226	3.63	0.363138	55.2805	1.9981	55.1356	5.36455	48.8232	222.848	55.2805	1.9981
PO188-20C	1003.89	2447	1.5961	20.9874	9.31159	0.0640591	9.61342	0.00975075	2.39	0.248611	62.5529	1.48779	63.046	5.87662	81.7856	221.423	62.5529	1.48779
PO188-21C	5769.08	1593	6.31222	21.0128	8.28194	0.0546511	8.92261	0.00832877	3.32	0.372088	53.4683	1.76781	54.0285	4.69478	78.9195	196.962	53.4683	1.76781
PO188-22R	6512.63	495	10.2827	21.5556	7.02295	0.0589663	7.13686	0.00921854	1.27	0.17795	59.1543	0.747824	58.1746	4.03516	18.0053	168.881	59.1543	0.747824
PO188-23C	211.552	1304	4.42232	20.6509	14.936	0.113006	17.804	0.0169254	9.69	0.544261	108.195	10.3966	108.711	18.3568	120.01	353.689	108.195	10.3966
PO188-24R	4810.82	6703	5.79951	20.2532	4.54721	0.0612718	4.72939	0.00900021	1.3	0.274877	57.7595	0.74752	60.3828	2.77249	165.65	106.311	57.7595	0.74752
PO188-25C	1186.81	3329	6.11071	20.4057	9.30553	0.0603784	9.58316	0.00893577	2.29	0.238961	57.3478	1.30744	59.5277	5.54069	148.09	218.548	57.3478	1.30744
PO188-26C	973.917	3450	1.44225	20.8526	9.23943	0.059955	9.828	0.00906745	3.35	0.340863	58.1891	1.94056	59.1222	5.64466	97.058	219.059	58.1891	1.94056
PO188-27R	1630.14	3128	3.90462	21.5904	5.24733	0.0565471	5.58072	0.00885463	1.9	0.340458	56.8294	1.07501	55.8523	3.03279	14.1179	126.203	56.8294	1.07501
PO188-28C	1028.24	2118	0.995128	20.6876	10.2797	0.0627451	10.9982	0.00941432	3.91	0.355514	60.4047	2.35079	61.7915	6.59336	115.83	242.973	60.4047	2.35079
PO188-29R	1016.27	3006	1.04068	21.6202	9.64233	0.0597666	10.0982	0.00937169	3	0.297081	60.1325	1.79559	58.9417	5.78268	10.8017	232.401	60.1325	1.79559
PO188-30C	1424.73	2377	2.08429	20.8855	7.2585	0.0637347	7.39419	0.00965426	1.41	0.19069	61.9369	0.869128	62.7365	4.49848	93.3309	172.107	61.9369	0.869128
PO188-31R	7661.91	6035	17.5361	18.5585	6.87017	0.0679105	8.29029	0.00914066	4.64	0.559691	58.6568	2.70933	66.7147	5.35311	366.174	155.013	58.6568	2.70933
PO188-32C	3418.39	395	1.96213	21.5798	18.7049	0.063848	18.9133	0.00999293	2.80001	0.148044	64.0988	1.78588	62.8446	11.5261	15.3072	452.902	64.0988	1.78588
PO188-34C	1203.36	5805	9.35295	21.0406	6.11883	0.0598243	7.43862	0.00912924	4.23	0.568654	58.5839	2.46687	58.9969	4.26352	75.7746	145.513	58.5839	2.46687
PO188-35R	4112.97	633	5.63915	21.1622	9.42437	0.0604743	10.2225	0.00928175	3.96	0.387379	59.558	2.34764	59.6195	5.91922	62.0671	224.919	59.558	2.34764
PO188-36C	489.596	333	3.33729	20.9504	17.7677	0.0612001	17.8275	0.00929914	1.46001	0.0818962	59.6691	0.867155	60.3142	10.4398	85.9734	424.237	59.6691	0.867155
PO188-37R	1361.23	604	2.76817	20.8688	9.39856	0.0617371	9.92517	0.00934419	3.19	0.321405	59.9569	1.90376	60.8279	5.86006	95.224	222.922	59.9569	1.90376
PO188-38R	639.86	919	2.64294	21.5386	7.75434	0.0573229	8.39632	0.00895456	3.22	0.383501	57.4679	1.84224	56.5976	4.62213	19.8938	186.421	57.4679	1.84224
PO188-39C	374.107	521	1.53936	20.6526	14.3801	0.0667428	14.4415	0.0099972	1.33001	0.0920961	64.1261	0.848653	65.6038	9.17485	119.82	340.416	64.1261	0.848653
PO188-40R	1235.76	2109	2.13755	21.0482	8.06654	0.0637539	8.12829	0.00973241	1	0.123027	62.4358	0.621345	62.7548	4.9465	74.9136	191.976	62.4358	0.621345
PO188-41C	747.838	1181	1.72531	21.1239	11.8768	0.0630799	12.6518	0.00966415	4.36	0.344615	62	2.69024	62.1113	7.62281	66.3801	283.566	62	2.69024
PO188-42R	579.114	899	2.12268	20.1843	9.20048	0.0680457	9.40073	0.00996122	1.93	0.205303	63.8964	1.22711	66.8432	6.08146	173.612	215.061	63.8964	1.22711
PO188-43C	476.575	2523	1.69148	21.0056	10.4217	0.135628	10.7608	0.0206626	2.68	0.249053	131.842	3.49749	129.143	13.05	79.7238	248.008	131.842	3.49749
PO188-44R	2398.32	4468	10.1447	21.1512	3.98629	0.0562148	4.62742	0.00862352	2.35	0.507843	55.3525	1.29521	55.5329	2.50074	63.2984	94.954	55.3525	1.29521
PO188-45C	831.163	551	3.56883	21.2373	26.4277	0.0582703	26.6758	0.00897525	3.63001	0.136078	57.6	2.08157	57.507	14.9152	53.6119	640.236	57.6	2.08157
PO188-46R	2197.6	677	8.6633	20.4043	10.167	0.0656692	10.216	0.00971811	1	0.0978857	62.3445	0.620442	64.5814	6.3923	148.255	238.862	62.3445	0.620442
PO188-47C	1941.12	4047	10.1053	21.2268	5.65091	0.0557687	6.83216	0.00858565	3.84	0.562048	55.1104	2.10722	55.104	3.66448	54.8006	134.888	55.1104	2.10722
PO188-48R	5404.93	1577	6.41096	21.2784	8.72897	0.0574292	9.31088	0.00886277	3.24	0.34798	56.8814	1.83485	56.6997	5.13459	49.008	208.801	56.8814	1.83485
PO188-49C	470.194	3668	12.5472	20.3105	5.00092	0.188939	5.09992	0.0278318	1	0.196082	176.964	1.74557	175.724	8.22935	159.045	117.072	176.964	1.74557
PO188-51C	269.332	35360	1.6095	13.4658	2.25683	1.83689	2.57505	0.179397	1.24	0.481544	1063.68	12.1589	1058.75	16.9315	1048.58	45.5018	1048.58	45.5018
PO188-52C	4738.65	443	40.1826	20.9556	11.1882	0.0629986	12.9293	0.00957482	6.48	0.501189	61.4296	3.96174	62.0336	7.78055	85.3795	266.088	61.4296	3.96174
PO188-53R	5215.86	2052	86.1928	20.7857	9.63004	0.0666434	9.84375	0.0100466	2.04	0.207238	64.4415	1.30806	65.5092	6.24502	104.662	228.027	64.4415	1.30806
PO188-54C	626.322	4982	1.88681	20.8751	7.8581	0.0577169	8.82212	0.00873838	4.01	0.454539	56.0865	2.23931	56.9759	4.8881	94.5043	186.294	56.0865	2.23931
PO188-55R	743.364	2811	3.74103	21.3487	7.61354	0.0579449	8.43032	0.00897193	3.62	0.429402	57.5789	2.07507	57.1948	4.68845	41.1153	182.32	57.5789	2.07507
Sample							Isotope ratios						Apparent ages (Ma)
PO413	U	206Pb	U/Th	206Pb*	±	207Pb*	±	206Pb*	±	error	206Pb*	±	207Pb*	±	206Pb*	±	Best age	±
14Q 98°41'34.5"O 16°48'56.3"N
	(ppm)	204Pb		207Pb*	(%)	235U*	(%)	238U	(%)	corr.	238U*	(Ma)	235U	(Ma)	207Pb*	(Ma)	(Ma)	(Ma)
PO413-01C	254.057	170789	3.93926	14.0726	1.63369	1.45079	2.27516	0.148074	1.58348	0.695987	890.159	13.1656	910.201	13.6762	959.119	33.3851	959.119	33.3851
PO413-02C	29.1705	7792.35	2.02	14.0364	8.1562	1.50038	8.65761	0.15274	2.90357	0.335378	916.305	24.8013	930.538	52.7976	964.427	166.807	964.427	166.807
PO413-04C	124.795	15294.9	1.36341	19.0576	14.085	0.308029	14.3255	0.0425754	2.61383	0.18246	268.777	6.88093	272.652	34.2672	306.056	322.278	268.777	6.88093
PO413-05C	96.3348	53789.6	2.07331	12.6695	1.18852	2.10992	3.42938	0.193876	3.21684	0.938024	1142.34	33.6757	1152.05	23.6287	1170.35	23.5221	1170.35	23.5221
PO413-06C	121.144	48127.6	2.15823	14.0183	2.49112	1.49826	3.93934	0.152329	3.05168	0.774667	914.005	26.0055	929.681	23.993	967.043	50.8351	967.043	50.8351
PO413-07C	156.915	1866.05	1.20501	11.7794	94.2515	0.0636854	94.8269	0.00544079	10.4299	0.109989	34.9785	3.63835	62.6894	57.7106	1313.1	63.6842	34.9785	3.63835
PO413-08C	303.698	42378.3	1.72202	19.3667	5.65718	0.26395	6.44826	0.0370745	3.09458	0.47991	234.674	7.13159	237.845	13.6738	269.261	129.801	234.674	7.13159
PO413-10C	67.7725	19134.7	2.91717	12.6498	6.5363	1.55683	7.49718	0.142831	3.67213	0.489801	860.654	29.5856	953.207	46.3841	1173.46	129.468	1173.46	129.468
PO413-11C	337.138	42239.6	1.34745	19.2194	5.16168	0.306115	5.27359	0.0426702	1.08067	0.204922	269.363	2.85095	271.166	12.5505	286.765	118.068	269.363	2.85095
PO413-12C	143.732	56917.5	3.06058	14.1937	2.00474	1.48101	2.63205	0.152459	1.70549	0.647969	914.731	14.5443	922.645	15.9547	941.631	41.1036	941.631	41.1036
PO413-13C	180.14	29934.2	2.39539	19.6871	8.40031	0.302951	10.9001	0.0432566	6.94597	0.63724	272.987	18.5658	268.702	25.7393	231.501	194.247	272.987	18.5658
PO413-14C	66.982	8376.18	2.32458	18.4874	18.9909	0.353446	19.9821	0.0473912	6.2153	0.311043	298.485	18.1289	307.31	53.0333	374.812	430.825	298.485	18.1289
PO413-15C	275.8	118911	4.75751	13.5548	1.20182	1.69992	3.60607	0.167116	3.3999	0.942829	996.203	31.3829	1008.5	23.0577	1035.3	24.2967	1035.3	24.2967
PO413-17C	96.5582	49254.4	3.66434	13.4968	1.82123	1.73553	2.40207	0.169888	1.56622	0.65203	1011.49	14.6619	1021.8	15.4753	1043.94	36.7499	1043.94	36.7499
PO413-18C	271.452	53548.4	4.11958	17.6418	5.36517	0.390472	6.4279	0.0499612	3.54019	0.550753	314.283	10.8594	334.714	18.3305	479.218	118.653	314.283	10.8594
PO413-19C	46.8829	19656.3	4.14688	14.5737	3.31033	1.42621	3.95517	0.150749	2.1645	0.547258	905.159	18.2789	899.965	23.6118	887.256	68.4073	905.159	18.2789
PO413-20C	84.0912	3113.57	1.94762	21.1996	23.6588	0.256041	25.1651	0.0393673	8.5758	0.340781	248.91	20.9393	231.471	52.1334	57.856	570.947	248.91	20.9393
PO413-22C	233.835	37886.7	2.15559	16.5959	3.27345	0.502924	6.6356	0.0605343	5.77198	0.86985	378.874	21.2384	413.68	22.55	612.756	70.7514	378.874	21.2384
PO413-23C	306.199	106096	3.8421	14.38	0.952917	1.36344	2.27824	0.142198	2.06938	0.908323	857.081	16.6078	873.349	13.3458	914.848	19.6019	857.081	16.6078
PO413-24C	110.326	8750.89	2.33199	19.0442	4.80955	0.361174	5.29099	0.0498859	2.20518	0.41678	313.821	6.75457	313.091	14.256	307.676	109.582	313.821	6.75457
PO413-25C	339.193	147437	4.07365	13.4745	0.549384	1.79775	2.60808	0.175687	2.54956	0.977562	1043.37	24.5603	1044.64	17.0181	1047.32	11.0966	1047.32	11.0966
PO413-26C	46.9711	5654.64	1.67044	24.5215	23.5817	0.248094	24.7849	0.0441226	7.62855	0.30779	278.336	20.7812	225.027	50.0654	-301.275	609.844	278.336	20.7812
PO413-27C	1576.05	36702	2.06965	18.9874	1.26856	0.316891	3.17168	0.043639	2.90694	0.91653	275.35	7.83574	279.508	7.74976	314.455	28.8441	275.35	7.83574
PO413-29C	301.903	86445.3	1.36987	10.8097	0.523725	2.43368	3.61624	0.190799	3.57811	0.989457	1125.7	36.9586	1252.61	26.0307	1477.85	9.9319	1477.85	9.9319
PO413-31C	1336.29	92476.6	11.6064	11.7237	4.62646	0.1868	12.4822	0.0158833	11.5931	0.928774	101.586	11.6847	173.895	19.9515	1322.29	89.6563	101.586	11.6847
PO413-32C	69.7607	3085.75	1.56695	18.886	14.6318	0.272515	15.4735	0.0373275	5.03407	0.325334	236.246	11.6775	244.703	33.6594	326.65	333.679	236.246	11.6775
PO413-34C	403.939	40110.4	1.46048	19.8962	2.38193	0.280463	3.66551	0.0404712	2.7861	0.760085	255.753	6.98603	251.025	8.15234	207.074	55.257	255.753	6.98603
PO413-35C	165.3	13551.3	2.41298	20.2049	10.0622	0.220327	11.8818	0.0322867	6.31892	0.531817	204.844	12.7404	202.182	21.7856	171.226	235.392	204.844	12.7404
PO413-38C	161.208	11329.7	2.047	19.7537	9.99707	0.314293	10.0429	0.045028	0.958153	0.0954062	283.924	2.66139	277.503	24.3901	223.715	231.634	283.924	2.66139
PO413-39C	81.0095	5201.16	1.34932	16.7833	29.7129	0.307085	30.0533	0.0373795	4.51053	0.150084	236.569	10.4771	271.919	71.8124	588.486	658.039	236.569	10.4771
PO413-40C	117.542	13292.7	1.81234	20.9497	8.6521	0.302848	9.45298	0.0460153	3.8079	0.402825	290.011	10.7986	268.622	22.3152	86.092	205.52	290.011	10.7986
PO413-41C	382.752	4620.67	8.103	22.8009	50.3341	0.0266891	51.2287	0.0044135	9.53195	0.186066	28.3887	2.70004	26.7443	13.5227	-118.635	1317.34	28.3887	2.70004
PO413-45C	78.4567	34605.5	2.61656	12.6268	2.18656	2.08368	3.17454	0.19082	2.30144	0.724969	1125.82	23.7738	1143.45	21.7841	1177.07	43.2674	1177.07	43.2674
PO413-44C	312.315	30799.4	1.41922	16.4649	33.534	0.31411	33.8798	0.0375094	4.82872	0.142525	237.377	11.2538	277.361	82.4087	629.845	742.08	237.377	11.2538
PO413-46C	134.943	13257.7	0.901339	21.9283	13.2838	0.274956	13.5945	0.0437288	2.89013	0.212595	275.904	7.80578	246.648	29.7774	-23.2991	322.81	275.904	7.80578
PO413-47C	176.323	48836.1	5.06457	14.2389	2.13745	1.2804	3.08197	0.132227	2.22033	0.720424	800.56	16.7157	837.034	17.5727	935.114	43.8281	800.56	16.7157
PO413-48C	117.376	63776.1	1.78681	13.1301	2.299	1.93324	5.49346	0.1841	4.98925	0.908218	1089.33	50.0067	1092.66	36.7793	1099.27	46.0017	1099.27	46.0017
PO413-49C	752.911	52370.4	3.48354	20.0552	3.50735	0.156332	14.9131	0.0227391	14.4948	0.971951	144.944	20.7751	147.488	20.475	188.561	81.6188	144.944	20.7751
PO413-50C	62.702	97523.4	1.03211	4.01718	1.34423	19.9372	4.86774	0.580877	4.67846	0.961114	2952.33	110.828	3088.32	47.0993	3177.97	21.2978	3177.97	21.2978
PO413-51C	310.015	14899.8	1.80205	19.1308	7.95233	0.240367	8.25639	0.0333509	2.22	0.268883	211.486	4.61883	218.721	16.2474	297.312	181.701	211.486	4.61883
PO413-52C	27.8053	16614.7	2.36767	12.8377	5.71519	1.98858	6.50696	0.185153	3.11081	0.478074	1095.06	31.3293	1111.64	43.9904	1144.19	113.678	1144.19	113.678
PO413-53C	243.256	117922	3.11043	12.1106	0.823119	2.37332	1.13564	0.208459	0.782402	0.688952	1220.6	8.70035	1234.6	8.11294	1259.14	16.0902	1259.14	16.0902
PO413-54C	160.301	39278.3	8.20538	17.1325	4.41385	0.687362	6.39132	0.0854094	4.62243	0.723236	528.33	23.4478	531.214	26.4421	543.629	96.5397	528.33	23.4478
PO413-55C	86.3963	39823.2	2.28127	14.0641	2.30037	1.5145	3.13295	0.154482	2.1269	0.678879	926.04	18.3467	936.256	19.1625	960.398	47.0077	960.398	47.0077
PO413-56C	105.096	17223	2.29817	19.7713	16.5898	0.312848	17.1428	0.0448609	4.319	0.251942	282.893	11.954	276.386	41.5024	221.634	386.025	282.893	11.954
PO413-57C	114.163	36448.6	2.98153	12.8534	1.60451	1.87295	3.71835	0.174599	3.35435	0.902108	1037.4	32.1428	1071.57	24.6186	1141.8	31.9205	1141.8	31.9205
PO413-58C	133.048	10749.9	1.40068	20.7755	9.09715	0.266683	10.4428	0.0401833	5.12782	0.491038	253.969	12.7699	240.038	22.3278	105.821	215.337	253.969	12.7699
PO413-59C	125.225	16253.8	2.97049	14.4498	3.73532	1.3788	7.89994	0.144499	6.96107	0.881154	870.051	56.657	879.927	46.5266	904.834	77.0126	870.051	56.657
PO413-60C	356.603	2562.09	4.19938	23.6751	65.3343	0.0265758	66.875	0.00456328	14.2724	0.213419	29.3499	4.17942	26.6323	17.5806	-212.272	1833.19	29.3499	4.17942
PO413-61C	25.5292	4932.28	2.53893	20.7051	52.2233	0.351925	54.307	0.0528476	14.8988	0.274343	331.981	48.2099	306.168	144.511	113.868	1317.14	331.981	48.2099
PO413-62C	148.32	36251	7.24209	14.4066	2.99622	1.10757	8.8029	0.115726	8.2773	0.940293	705.915	55.3465	757.003	47.0061	911.011	61.7011	705.915	55.3465
PO413-63C	300.731	47449.3	1.96726	15.3806	3.39334	0.612601	8.89099	0.0683361	8.21797	0.924303	426.123	33.8867	485.199	34.3081	774.864	71.4083	426.123	33.8867
PO413-64C	116.694	8461.86	1.80201	20.0137	14.5387	0.279539	14.9548	0.0405759	3.50316	0.23425	256.402	8.8059	250.292	33.186	193.422	339.562	256.402	8.8059
PO413-65C	103.536	10831	1.4449	20.1313	15.1788	0.308878	16.2344	0.0450981	5.75862	0.354717	284.357	16.0192	273.311	38.9196	179.737	355.554	284.357	16.0192
PO413-66C	142.974	17280.1	2.49924	19.3907	14.5397	0.239866	14.6849	0.0337336	2.06031	0.140301	213.873	4.33416	218.311	28.8544	266.437	335.123	213.873	4.33416
PO413-67C	154.387	25438.7	0.980848	19.4786	9.42969	0.279218	10.3113	0.0394458	4.17173	0.404579	249.397	10.2055	250.037	22.8568	256.031	217.159	249.397	10.2055
PO413-69C	196.159	280366	2.2976	12.2918	0.852189	2.13502	4.45492	0.190334	4.37265	0.981533	1123.18	45.0731	1160.21	30.8151	1230.05	16.7389	1230.05	16.7389
PO413-70C	289.679	15417	20.58	23.7909	27.5812	0.0544542	28.4768	0.00939594	7.08548	0.248816	60.2873	4.25174	53.8389	14.9333	-224.537	705.67	60.2873	4.25174
PO413-71C	39.6736	2842.67	3.3317	17.3177	43.4114	0.24921	44.6942	0.0313007	10.631	0.237861	198.684	20.8	225.934	90.775	520.061	997.753	198.684	20.8
PO413-73C	268.328	18119.2	1.62899	20.0523	6.73488	0.253853	9.64303	0.0369185	6.90141	0.715689	233.704	15.84	229.701	19.8259	188.901	156.893	233.704	15.84
PO413-75C	574.402	571976	2.35064	16.6612	1.58145	0.516955	6.58548	0.0624679	6.39278	0.970738	390.617	24.2299	423.115	22.7914	604.267	34.2176	390.617	24.2299
PO413-76C	50.3656	16819.2	2.86727	13.7882	3.92656	1.53908	4.70778	0.153911	2.59718	0.551677	922.848	22.3315	946.137	28.9834	1000.71	79.7492	1000.71	79.7492
PO413-78C	200.074	29776.6	0.984801	19.5768	3.42326	0.302654	3.55391	0.0429721	0.954767	0.268652	271.229	2.53588	268.471	8.38424	244.485	78.8864	271.229	2.53588
PO413-79C	153.475	58855.1	3.31872	13.4893	1.66889	1.6671	2.77724	0.163098	2.21988	0.799312	973.972	20.067	996.084	17.6283	1045.11	33.6706	1045.11	33.6706
PO413-80C	211.801	53655.8	4.94679	14.707	1.19858	1.04253	4.24719	0.111201	4.07456	0.959354	679.721	26.2856	725.174	22.015	868.384	24.8379	679.721	26.2856
PO413-81C	265.301	33162.7	1.27006	18.2807	3.97122	0.343646	4.7569	0.0455621	2.6187	0.550505	287.218	7.35627	299.931	12.3539	400.061	89.0218	287.218	7.35627
PO413-83C	807.021	507283	2.54741	12.3989	0.405153	1.98355	1.22573	0.178372	1.15684	0.943792	1058.07	11.2885	1109.93	8.27457	1212.96	7.98694	1212.96	7.98694
PO413-85C	91.2675	30280.5	2.13845	12.9741	3.41065	2.09161	6.0319	0.196814	4.97506	0.824792	1158.18	52.7419	1146.06	41.4592	1123.2	68.0047	1123.2	68.0047
PO413-86C	116.183	61363.4	5.04145	14.1029	2.16744	1.2259	6.73353	0.125389	6.37516	0.946778	761.509	45.7904	812.47	37.6722	954.731	44.3283	761.509	45.7904
PO413-87C	129.649	84144.7	2.89449	14.1279	1.79595	1.53691	2.23878	0.15748	1.33668	0.597057	942.757	11.7235	945.269	13.7725	951.144	36.7408	951.144	36.7408
PO413-88C	211.236	32184.9	4.04985	17.0918	5.0681	0.659204	6.18434	0.081716	3.54407	0.573072	506.357	17.259	514.127	24.9535	548.839	110.757	506.357	17.259
PO413-90C	182.381	19877.1	1.34776	19.5953	6.36028	0.299405	8.14759	0.042551	5.09217	0.62499	268.626	13.3978	265.935	19.0645	242.284	146.678	268.626	13.3978
PO413-91C	59.2311	31925.5	2.55896	11.3932	1.6896	2.79241	2.86251	0.23074	2.31068	0.80722	1338.38	27.9265	1353.51	21.4045	1377.48	32.4832	1377.48	32.4832
PO413-92C	130.688	10796.9	1.92029	21.5751	16.7823	0.197308	18.6025	0.0308742	8.02542	0.431416	196.018	15.4945	182.846	31.1369	15.845	405.709	196.018	15.4945
PO413-93C	128.642	71908.6	4.46436	13.1586	1.96103	1.82903	2.57826	0.174555	1.67386	0.649219	1037.16	16.036	1055.93	16.927	1094.98	39.2451	1094.98	39.2451
PO413-97C	188.74	106904	4.81258	12.3103	1.02936	2.20439	3.54285	0.196815	3.39002	0.956861	1158.18	35.9381	1182.44	24.7521	1227.06	20.2099	1227.06	20.2099
PO413-98C	656.415	196098	3.05449	13.4847	0.522255	1.66508	5.37213	0.162845	5.34668	0.995263	972.569	48.2685	995.312	34.0929	1045.79	10.5517	1045.79	10.5517
PO413-99C	110.184	50034.2	2.67885	13.7008	3.25023	1.7312	5.59114	0.172025	4.54937	0.813676	1023.26	43.0459	1020.2	36.0003	1013.61	65.8863	1013.61	65.8863
PO413-100C	121.192	65948.5	1.79243	11.6116	2.05807	2.61724	2.38816	0.220412	1.21148	0.507285	1284.05	14.1047	1305.49	17.547	1340.87	39.7713	1340.87	39.7713
Sample							Isotope ratios						Apparent ages (Ma)
PO323	U	206Pb	U/Th	206Pb*	±	207Pb*	±	206Pb*	±	error	206Pb*	±	207Pb*	±	206Pb*	±	Best age	±
14Q 98°44'29.4"O 16°48'4.8"N
	(ppm)	204Pb		207Pb*	(%)	235U*	(%)	238U	(%)	corr.	238U*	(Ma)	235U	(Ma)	207Pb*	(Ma)	(Ma)	(Ma)
PO323-1C	1028.64	11694	1.02375	21.2201	12.5659	0.0302658	12.8304	0.00465799	2.59142	0.201976	29.9576	0.774528	30.2755	3.82713	55.5706	300.713	29.9576	0.774528
PO323-2R	1570.87	36879.6	1.32508	20.2523	6.74974	0.0327409	6.84577	0.0048091	1.14264	0.166911	30.9271	0.352538	32.712	2.2037	165.757	157.891	30.9271	0.352538
PO323-3C	4887.6	17389.5	0.313291	20.7318	5.06858	0.031796	28.7374	0.00478088	28.2868	0.984323	30.7461	8.67639	31.7825	8.99221	110.814	119.699	30.7461	8.67639
PO323-4R	1850.44	5416.18	0.409961	21.5653	8.36909	0.0297323	10.463	0.00465032	6.2795	0.600164	29.9084	1.87375	29.7496	3.06754	16.9182	201.364	29.9084	1.87375
PO323-5R	1517.95	14385.7	6.0289	20.8291	10.4567	0.0309827	10.5181	0.00468046	1.13503	0.107912	30.1018	0.340868	30.9818	3.2095	99.7223	247.933	30.1018	0.340868
PO323-6C	3782.06	2884.16	0.599793	20.6896	8.39272	0.0317776	8.95928	0.0047684	3.13543	0.349964	30.666	0.959228	31.7644	2.80181	115.641	198.228	30.666	0.959228
PO323-7R	865.81	10857.6	2.28731	23.7089	11.0482	0.0288165	11.6966	0.0049551	3.84028	0.328325	31.8637	1.22064	28.8462	3.32655	-215.858	278.381	31.8637	1.22064
PO323-8C	2850.41	31080.7	1.04758	22.0281	4.04727	0.0306644	4.1934	0.00489903	1.09734	0.261683	31.5041	0.344863	30.6683	1.26682	-34.2971	98.2309	31.5041	0.344863
PO323-9R	2682.88	22994.1	19.6119	21.6015	6.24553	0.0279322	6.40488	0.00437611	1.41977	0.221671	28.1486	0.398776	27.973	1.76718	12.9331	150.276	28.1486	0.398776
PO323-10C	143.296	1765.07	0.90209	18.1379	61.1372	0.0365916	62.4219	0.00481357	12.5989	0.201834	30.9558	3.89074	36.4909	22.3775	417.606	1511.13	30.9558	3.89074
PO323-11C	3192.43	53406.2	0.420561	21.0875	2.70015	0.0314465	2.95297	0.00480947	1.19549	0.404843	30.9295	0.368873	31.4385	0.914144	70.4886	64.2393	30.9295	0.368873
PO323-12C	1927.81	24526.4	1.53955	20.9315	5.72279	0.0321318	6.21865	0.00487791	2.43337	0.391303	31.3686	0.761461	32.1129	1.96574	88.1595	135.752	31.3686	0.761461
PO323-13R	1060.78	1834.76	0.574082	16.9809	27.1321	0.0397046	33.9143	0.0048899	20.3476	0.599973	31.4455	6.38284	39.5356	13.1513	563.002	601.296	31.4455	6.38284
PO323-14C	3060.09	3254.73	0.491089	21.7226	5.12658	0.0323324	9.26991	0.00509388	7.7233	0.833158	32.7539	2.52327	32.3103	2.94799	-0.523572	123.631	32.7539	2.52327
PO323-15R	1747.98	14602.5	1.38457	20.7738	7.91411	0.0327396	7.96925	0.00493275	0.93581	0.117428	31.7204	0.296113	32.7107	2.56526	106.01	187.237	31.7204	0.296113
PO323-16C	902.765	19504.4	0.800677	24.3147	17.9764	0.0273167	18.1337	0.0048172	2.38289	0.131407	30.9791	0.736426	27.3648	4.896	-279.669	460.621	30.9791	0.736426
PO323-17R	1034.15	29934.3	9.01436	23.7114	16.1723	0.0263146	16.3324	0.00452535	2.28161	0.139698	29.1064	0.6626	26.3739	4.25205	-216.119	408.679	29.1064	0.6626
PO323-18C	417.179	4264.93	11.8481	22.5444	53.5184	0.0272356	54.2187	0.00445322	8.68613	0.160205	28.6436	2.4825	27.2847	14.5974	-90.8179	1406.21	28.6436	2.4825
PO323-19C	1706.38	12312.9	0.6211	21.5433	7.51629	0.0309188	7.87248	0.00483095	2.34122	0.297393	31.0673	0.725605	30.9189	2.3974	19.4224	180.702	31.0673	0.725605
PO323-20R	801.981	11758.1	9.97433	20.7138	18.8165	0.0316522	19.0998	0.00475513	3.27771	0.171609	30.5809	0.999978	31.6409	5.95024	112.871	447.421	30.5809	0.999978
PO323-21C	3581.18	2725.35	0.250188	20.119	11.4498	0.0297424	13.4148	0.0043399	6.98984	0.521055	27.9163	1.94708	29.7595	3.93426	181.169	267.563	27.9163	1.94708
PO323-22R	952.893	17012.8	12.5425	23.4887	29.3141	0.0274786	29.4586	0.00468114	2.91419	0.0989247	30.1062	0.875306	27.5249	7.9997	-192.455	746.921	30.1062	0.875306
PO323-23C	739.245	9480.92	0.966461	23.5035	20.4986	0.0286834	20.6833	0.00488947	2.7579	0.13334	31.4427	0.865048	28.7148	5.85604	-194.029	517.496	31.4427	0.865048
PO323-24R	447.349	4616.97	2.76083	25.8498	36.6945	0.0260586	37.2515	0.00488547	6.41756	0.172277	31.4171	2.0113	26.1206	9.60651	-438.013	992.454	31.4171	2.0113
Sample							Isotope ratios						Apparent ages (Ma)
PO411	U	206Pb	U/Th	206Pb*	±	207Pb*	±	206Pb*	±	error	206Pb*	±	207Pb*	±	206Pb*	±	Best age	±
14Q 98°42'52.9"O 16°48'35.5"N
	(ppm)	204Pb		207Pb*	(%)	235U*	(%)	238U	(%)	corr.	238U*	(Ma)	235U	(Ma)	207Pb*	(Ma)	(Ma)	(Ma)
PO411-1C	579.993	5154.91	3.04694	21.7289	16.3189	0.0400145	16.8742	0.00630601	4.29311	0.254419	40.5235	1.73426	39.8382	6.59229	-1.2302	395.653	40.5235	1.73426
PO411-2R	369.677	5396.36	2.65824	20.1107	9.58839	0.033473	11.1378	0.00488226	5.66694	0.5088	31.3965	1.77489	33.4315	3.66293	182.125	223.815	31.3965	1.77489
PO411-3C	349.386	4318.28	1.37062	20.2002	15.715	0.0426125	16.6215	0.00624296	5.41421	0.325735	40.1196	2.16541	42.3715	6.89797	171.773	368.795	40.1196	2.16541
PO411-4R	593.129	11634.1	3.47572	19.644	9.29834	0.0402094	10.0204	0.00572872	3.73479	0.372719	36.8243	1.37139	40.0285	3.93299	236.564	214.878	36.8243	1.37139
PO411-5C	379.375	5755.38	2.35937	19.1775	7.05522	0.04355	8.24636	0.00605731	4.26922	0.51771	38.9301	1.65701	43.2841	3.49437	291.766	161.318	38.9301	1.65701
PO411-7R	460.934	22572.7	2.947	21.2485	22.2115	0.0382271	22.4038	0.00589113	2.92928	0.130749	37.8653	1.10593	38.0916	8.37607	52.3675	535.761	37.8653	1.10593
PO411-8C	247.782	6876.81	3.87754	22.9156	29.4659	0.0373559	30.3363	0.00620855	7.21482	0.237828	39.8992	2.86976	37.2393	11.0928	-131.033	742.067	39.8992	2.86976
PO411-9R	446.122	4571.06	3.47516	24.1239	25.2691	0.0335841	25.5272	0.00587597	3.62127	0.141859	37.7681	1.36369	33.5406	8.42231	-259.66	649.252	37.7681	1.36369
PO411-10C	392.194	6580.63	2.06325	20.6167	11.1899	0.0305155	12.9317	0.00456286	6.48189	0.501239	29.3472	1.89793	30.5215	3.88825	123.922	264.206	29.3472	1.89793
PO411-11C	890.591	16846.5	2.71404	21.3349	4.08317	0.0390504	4.53906	0.00604248	1.98261	0.436788	38.8351	0.767633	38.8965	1.73215	42.686	97.6445	38.8351	0.767633
PO411-13R	469.412	9916.78	1.82354	19.4075	12.1273	0.0431444	12.4373	0.00607286	2.75955	0.221877	39.0298	1.07379	42.8894	5.22324	264.455	279.243	39.0298	1.07379
PO411-14C	297.108	5948.07	2.10481	21.3732	16.676	0.0352543	17.2373	0.00546489	4.36317	0.253124	35.133	1.52874	35.1801	5.96032	38.3727	401.407	35.133	1.52874
PO411-15R	1638.16	23149.3	4.6741	21.1764	3.74236	0.0374353	4.33199	0.00574953	2.18194	0.503682	36.9577	0.804089	37.317	1.58722	60.4856	89.1852	36.9577	0.804089
PO411-16C	1105.03	17235.8	3.33444	20.2893	7.08365	0.0398597	7.29618	0.00586542	1.74817	0.239601	37.7005	0.657146	39.687	2.83979	161.503	165.843	37.7005	0.657146
PO411-17R	1012.81	29215.7	4.72265	21.8448	6.80796	0.0311533	7.41202	0.00493571	2.93083	0.395415	31.7394	0.927941	31.1498	2.27378	-14.0604	164.696	31.7394	0.927941
PO411-18C	591.995	8133.97	1.66039	20.8844	16.0477	0.0372778	16.8823	0.00564639	5.24237	0.310526	36.2966	1.89746	37.1628	6.16057	93.4508	382.164	36.2966	1.89746
PO411-19C	1153.64	26464.1	3.50199	22.1429	3.81048	0.0398609	4.619	0.00640147	2.61064	0.565195	41.135	1.07047	39.6882	1.79784	-46.9243	92.6862	41.135	1.07047
PO411-20R	745.567	17263.8	2.86373	20.2686	8.50024	0.0433842	8.83665	0.00637757	2.41503	0.273297	40.9819	0.986585	43.1228	3.73084	163.868	198.993	40.9819	0.986585
PO411-21C	525.657	8439.6	2.94759	21.227	9.44427	0.0305654	11.1635	0.00470563	5.95221	0.533186	30.2633	1.79711	30.5707	3.3619	54.7884	225.724	30.2633	1.79711
PO411-22R	361.623	6794.55	2.51189	28.5561	34.5063	0.0289543	34.6289	0.00599668	2.91103	0.0840637	38.5417	1.11861	28.9822	9.89464	-707.127	983.305	38.5417	1.11861
PO411-23C	519.302	6075.68	3.30889	21.3337	10.764	0.0363743	12.9758	0.00562807	7.24623	0.558441	36.1792	2.61428	36.278	4.6243	42.8219	257.996	36.1792	2.61428
PO411-24R	1253.46	18465.7	4.32633	21.5377	4.97575	0.0367557	6.17623	0.00574145	3.65892	0.59242	36.9059	1.3465	36.6516	2.22332	20.0245	119.534	36.9059	1.3465
PO411-25C	577.786	21305.6	1.9473	21.2402	11.0102	0.0407647	11.517	0.00627972	3.379	0.293392	40.3551	1.35934	40.5703	4.58041	53.2964	263.385	40.3551	1.35934
PO411-28R	926.266	23079.1	2.99597	21.4941	5.90105	0.036706	6.90898	0.0057221	3.59328	0.520087	36.7819	1.31791	36.6029	2.48386	24.8569	141.653	36.7819	1.31791
PO411-29C	359.543	3442.03	2.43492	19.6848	26.9516	0.0422943	28.3423	0.00603826	8.76912	0.3094	38.8081	3.3929	42.0616	11.6782	231.772	632.425	38.8081	3.3929
PO411-30C	642.438	13149.4	3.35335	21.2349	15.4601	0.0371472	15.5258	0.00572105	1.42703	0.0919131	36.7752	0.523297	37.0349	5.64644	53.8997	370.737	36.7752	0.523297
Sample							Isotope ratios						Apparent ages (Ma)
PO412	U	206Pb	U/Th	206Pb*	±	207Pb*	±	206Pb*	±	error	206Pb*	±	207Pb*	±	206Pb*	±	Best age	±
14Q 98°41'34.5"O 16°48'56.3"N
	(ppm)	204Pb		207Pb*	(%)	235U*	(%)	238U	(%)	corr.	238U*	(Ma)	235U	(Ma)	207Pb*	(Ma)	(Ma)	(Ma)
PO412-2C	209.114	2658.04	1.37268	20.7437	30.4321	0.0332963	31.2728	0.00500934	7.20247	0.230311	32.2117	2.31425	33.2578	10.2325	109.436	733.486	32.2117	2.31425
PO412-4R	353.043	3704.05	2.5705	18.9089	20.4047	0.0364493	21.3184	0.00499867	6.17412	0.289615	32.1432	1.97962	36.3515	7.61261	323.876	467.682	32.1432	1.97962
PO412-5C	212.943	4437.57	0.983414	22.8407	45.9702	0.0309409	46.5036	0.00512557	7.02326	0.151026	32.9572	2.30876	30.9406	14.1724	-122.948	1190.88	32.9572	2.30876
PO412-6C	368.144	2699.44	4.15984	20.8769	24.3378	0.0318092	25.0661	0.00481635	5.99869	0.239315	30.9737	1.85356	31.7955	7.84656	94.3066	583.775	30.9737	1.85356
PO412-7C	1077.51	2165.73	0.884923	21.2535	10.8507	0.0325759	11.5725	0.0050214	4.02305	0.347639	32.289	1.29575	32.5496	3.70708	51.837	259.622	32.289	1.29575
PO412-10R	348.279	1302.03	2.82309	20.3738	17.7271	0.0339559	19.6791	0.00501749	8.54506	0.434219	32.264	2.75009	33.9058	6.56229	151.791	418.146	32.264	2.75009
PO412-12R	404.781	4046.19	2.89802	33.4227	32.3133	0.0198166	32.7679	0.00480363	5.43931	0.165995	30.8921	1.6763	19.9247	6.46536	-1167.11	1015.27	30.8921	1.6763
PO412-13C	181.704	1873.01	0.903012	26.6279	33.851	0.0255878	35.1534	0.00494161	9.47986	0.269672	31.7772	3.00503	25.6546	8.90571	-516.6	926.162	31.7772	3.00503
PO412-15C	172.011	4425.12	2.14855	20.2204	47.3053	0.0348935	48.1108	0.00511721	8.76696	0.182225	32.9035	2.87729	34.8261	16.4725	169.433	1165.5	32.9035	2.87729
PO412-16C	233.634	3083.58	1.89864	22.9528	31.2262	0.0304766	32.464	0.00507343	8.87911	0.273506	32.6227	2.88929	30.4832	9.74932	-135.042	788.895	32.6227	2.88929
PO412-17R	685.13	8566.44	2.611	24.7718	11.1793	0.0276971	12.2972	0.00497613	5.12296	0.416597	31.9986	1.63522	27.7408	3.36517	-327.313	288.031	31.9986	1.63522
PO412-22R	287.508	1435.62	3.10038	23.9408	29.1849	0.0275416	30.4115	0.00478219	8.54973	0.281135	30.7545	2.62316	27.5871	8.27689	-240.378	750.524	30.7545	2.62316
PO412-23C	408.91	3829.75	0.701019	18.5369	11.1084	0.0373744	11.2466	0.00502469	1.75754	0.156273	32.3102	0.566443	37.2574	4.11427	368.798	250.924	32.3102	0.566443
PO412-24C	167.95	4290.86	1.01931	24.0237	59.6552	0.0280962	59.977	0.00489539	6.20398	0.103439	31.4807	1.9483	28.135	16.6444	-249.122	1647.48	31.4807	1.9483
PO412-26C	329.485	2189.21	1.32773	32.3271	31.295	0.0210083	32.3459	0.00492556	8.1779	0.252827	31.6743	2.58394	21.1105	6.75797	-1065.69	959.84	31.6743	2.58394
PO412-27R	172.036	1682.53	1.41291	21.8052	37.2499	0.0322348	38.1755	0.0050978	8.35566	0.218875	32.7791	2.73196	32.2142	12.1055	-9.6801	927.865	32.7791	2.73196
PO412-28C	764.8	10364.1	1.58384	19.5676	11.2066	0.0357475	11.5068	0.0050732	2.6113	0.226935	32.6213	0.849687	35.6637	4.03254	245.544	258.782	32.6213	0.849687
PO412-29C	313.086	6413.26	1.25546	19.7899	18.6134	0.0348802	19.936	0.00500635	7.14043	0.358168	32.1925	2.29295	34.8131	6.82282	219.476	433.972	32.1925	2.29295
PO412-30C	397.078	9620.76	1.58636	21.3913	18.0802	0.0326439	18.6613	0.0050645	4.62056	0.247601	32.5655	1.50091	32.6165	5.99002	36.3523	435.847	32.5655	1.50091
Sample							Isotope ratios						Apparent ages (Ma)
PO315	U	206Pb	U/Th	206Pb*	±	207Pb*	±	206Pb*	±	error	206Pb*	±	207Pb*	±	206Pb*	±	Best age	±
14Q 98°44'16.5"O 16°49'23.3"N
	(ppm)	204Pb		207Pb*	(%)	235U*	(%)	238U	(%)	corr.	238U*	(Ma)	235U	(Ma)	207Pb*	(Ma)	(Ma)	(Ma)
PO315-2R	1581.97	13959.6	8.76352	21.2602	3.34535	0.0578616	6.05141	0.00892188	5.04264	0.8333	57.2591	2.87459	57.1148	3.36085	51.0808	79.8795	57.2591	2.87459
PO315-3C	888.575	11776.9	4.19114	18.5697	3.55197	0.186527	4.71553	0.0251215	3.10157	0.657735	159.943	4.8997	173.661	7.52717	364.803	80.0808	159.943	4.8997
PO315-4C	612.858	12092.8	1.84127	21.0823	5.32698	0.137614	5.40492	0.0210415	0.914527	0.169203	134.235	1.21492	130.916	6.63883	71.0927	126.763	134.235	1.21492
PO315-5C	835.384	8134.19	1.86699	22.083	9.11697	0.0676975	10.0337	0.0108425	4.19007	0.417598	69.5191	2.89725	66.5121	6.45985	-40.3456	221.819	69.5191	2.89725
PO315-7R	1959.51	25981.7	1.6859	20.7431	3.32282	0.10692	6.86308	0.0160854	6.00506	0.87498	102.868	6.12825	103.144	6.73128	109.55	78.4781	102.868	6.12825
PO315-8C	129.353	1430.63	3.23722	26.0498	49.7397	0.0483546	49.9569	0.00913568	4.65299	0.09314	58.625	2.71545	47.9483	23.4009	-458.318	1387.95	58.625	2.71545
PO315-9R	2688.07	22061.3	10.1724	21.4341	4.49791	0.0617195	5.12685	0.00959458	2.46037	0.479899	61.5558	1.50729	60.811	3.02618	31.6083	107.817	61.5558	1.50729
PO315-11R	1646.6	13482.7	1.83834	21.2029	2.62113	0.0616663	2.75914	0.00948291	0.861708	0.31231	60.8427	0.52182	60.7602	1.62729	57.4875	62.5027	60.8427	0.52182
PO315-12C	760.842	7407.63	4.38768	23.0486	8.60991	0.0543967	8.96278	0.00909317	2.49016	0.277833	58.3534	1.44654	53.7836	4.69509	-145.353	213.754	58.3534	1.44654
PO315-13R	2993.62	15550.8	4.92888	20.8005	3.70452	0.0603171	3.8571	0.00909942	1.07414	0.278483	58.3934	0.624394	59.469	2.22791	102.973	87.6277	58.3934	0.624394
PO315-14C	174.727	1609.53	2.20878	18.9648	76.799	0.0602957	76.899	0.00829341	3.9205	0.0509824	53.2423	2.07877	59.4485	44.4311	317.147	2104.94	53.2423	2.07877
PO315-16C	369.896	3036.39	3.75619	18.6596	7.79313	0.0642235	8.14082	0.00869149	2.35373	0.289127	55.7869	1.30741	63.203	4.98842	353.918	176.271	55.7869	1.30741
PO315-20C	386.875	3549.08	1.32643	22.4794	19.4154	0.0530551	19.5997	0.00864987	2.68132	0.136805	55.5208	1.4823	52.4908	10.0269	-83.7344	479.332	55.5208	1.4823
PO315-21C	401.736	4164.47	1.34622	22.1834	19.3158	0.0572178	19.3928	0.00920572	1.72653	0.0890294	59.0724	1.01525	56.4967	10.6575	-51.3718	473.89	59.0724	1.01525
PO315-22R	934.142	12340.8	2.07553	20.6801	6.6296	0.0681674	7.43651	0.0102242	3.36897	0.453032	65.5745	2.19799	66.9589	4.81881	116.724	156.461	65.5745	2.19799
PO315-23C	408.701	4292.76	2.04775	25.1148	13.7195	0.0484757	13.9773	0.00882985	2.67211	0.191175	56.671	1.50767	48.0656	6.56183	-362.779	356.46	56.671	1.50767
PO315-24R	1414.05	10550.5	3.62401	21.016	4.8468	0.0662881	7.19162	0.0101038	5.313	0.738776	64.8063	3.42591	65.1709	4.53963	78.5552	115.168	64.8063	3.42591
PO315-26R	1546.46	16492.2	2.58345	21.0667	3.72437	0.0597127	4.42955	0.00912351	2.39791	0.541344	58.5473	1.39755	58.89	2.53436	72.8433	88.5589	58.5473	1.39755
PO315-27C	519.937	25413.5	2.39917	17.6545	1.689	0.385505	12.8327	0.0493611	12.7211	0.991301	310.598	38.5752	331.081	36.2707	477.629	37.3399	310.598	38.5752
PO315-28R	1070.46	11587.2	3.56571	21.284	5.06683	0.0658512	6.14972	0.0101652	3.48515	0.566717	65.1983	2.26081	64.7548	3.85793	48.3824	121.062	65.1983	2.26081
PO315-29C	1104.88	9069.1	2.77614	21.8741	8.63896	0.0578642	9.05513	0.00917993	2.71362	0.299678	58.9077	1.59125	57.1173	5.0293	-17.3118	209.231	58.9077	1.59125
PO315-30C	2056.82	12197.4	5.29742	21.2447	3.32941	0.0625596	3.45619	0.00963926	0.927481	0.268354	61.8411	0.570822	61.6141	2.06618	52.8122	79.4742	61.8411	0.570822
PO315-31R	1542.46	15136.8	5.77317	21.7724	4.59596	0.0563562	4.85843	0.00889913	1.57527	0.324234	57.1137	0.89572	55.6689	2.63183	-6.04972	110.937	57.1137	0.89572
PO315-34R	2372.71	1799.32	4.44174	20.827	5.95538	0.0647444	6.01161	0.00977976	0.820278	0.136449	62.7381	0.51213	63.6999	3.71176	100	140.98	62.7381	0.51213
PO315-35C	1521.82	7036.5	2.25515	21.5473	5.35381	0.0599443	7.12079	0.00936786	4.69493	0.659327	60.108	2.80891	59.1119	4.08908	18.9674	128.664	60.108	2.80891
PO315-36C	358.733	46099.7	2.39981	13.5246	0.956289	1.59449	4.61814	0.156402	4.51804	0.978326	936.752	39.392	968.054	28.8259	1039.8	19.3223	1039.8	19.3223
PO315-37R	1776.52	27343.4	5.31976	19.0018	3.23448	0.144252	11.9451	0.0198799	11.4988	0.962641	126.897	14.449	136.824	15.2915	312.734	73.6097	126.897	14.449
PO315-38C	468.668	37426.4	4.57975	17.0791	1.15643	0.620061	3.68177	0.0768065	3.49544	0.949391	477.033	16.0724	489.886	14.3093	550.46	25.2664	477.033	16.0724
PO315-39C	1211.32	12787.9	0.48354	21.5014	5.28425	0.0570797	6.49081	0.00890116	3.76925	0.580707	57.1267	2.14374	56.364	3.55881	24.048	126.849	57.1267	2.14374
PO315-40R	1089.32	19218.1	91.7116	19.2654	5.49832	0.0857381	8.50912	0.0119798	6.49412	0.763195	76.7681	4.95585	83.5255	6.82292	281.314	125.892	76.7681	4.95585
Sample							Isotope ratios						Apparent ages (Ma)
PO409	U	206Pb	U/Th	206Pb*	±	207Pb*	±	206Pb*	±	error	206Pb*	±	207Pb*	±	206Pb*	±	Best age	±
14Q 98°42'44.4"O 16°49'58.9"N
	(ppm)	204Pb		207Pb*	(%)	235U*	(%)	238U	(%)	corr.	238U*	(Ma)	235U	(Ma)	207Pb*	(Ma)	(Ma)	(Ma)
PO409-3C	224.826	2159.79	1.12443	27.2918	40.5465	0.0237262	42.0412	0.00469634	11.1105	0.264277	30.2037	3.34794	23.8099	9.89381	-582.85	1137.24	30.2037	3.34794
PO409-4C	294.421	8490.19	0.997661	22.7452	29.1476	0.0280839	30.3275	0.00463282	8.37676	0.27621	29.7961	2.49019	28.1228	8.41211	-112.609	731.165	29.7961	2.49019
PO409-5C	588.636	18446.5	1.07822	18.8591	14.5158	0.0344481	14.783	0.00471179	2.79774	0.189254	30.3028	0.845805	34.3891	4.99865	329.83	330.811	30.3028	0.845805
PO409-7C	102.134	884.436	1.20174	11.8808	34.348	0.0605941	35.2147	0.00522127	7.76477	0.220498	33.5709	2.59993	59.7341	20.4312	1296.45	688.559	33.5709	2.59993
PO409-8R	188.476	1271.02	1.6294	27.091	60.2705	0.0230523	60.7925	0.00452937	7.9494	0.130763	29.1323	2.31062	23.1412	13.9099	-562.891	1772.76	29.1323	2.31062
PO409-9R	421.752	6470.84	1.82353	25.6908	24.6069	0.0243349	24.7251	0.00453426	2.41473	0.0976628	29.1637	0.702632	24.4134	5.96432	-421.831	652.673	29.1637	0.702632
PO409-10C	322.934	2698.04	1.31361	24.2469	41.6054	0.0281676	41.8506	0.00495342	4.52408	0.108101	31.853	1.4375	28.2055	11.6423	-272.571	1098.72	31.853	1.4375
PO409-11C	153.519	2216.16	1.34795	19.0832	35.8599	0.0335019	37.8225	0.00463681	12.0256	0.317947	29.8217	3.57795	33.4598	12.4497	303.016	842.071	29.8217	3.57795
PO409-12R	240.015	7948.82	1.88052	26.2587	48.7201	0.0251387	49.5116	0.00478756	8.81755	0.178091	30.789	2.70836	25.2098	12.3287	-479.447	1361.79	30.789	2.70836
PO409-13C	1773.39	9714.04	5.15266	21.8351	6.31877	0.027815	8.51139	0.00440485	5.70236	0.669968	28.3332	1.61211	27.8572	2.33881	-12.9883	152.802	28.3332	1.61211
PO409-14C	333.091	3434.59	1.3598	19.4642	18.7894	0.0334077	19.2944	0.00471608	4.38537	0.227287	30.3303	1.32697	33.3673	6.33347	257.771	435.123	30.3303	1.32697
PO409-15R	184.469	3225.65	1.7262	26.0549	53.081	0.0259851	55.1358	0.00491035	14.9118	0.270456	31.5767	4.69714	26.0478	14.1799	-458.836	1494.73	31.5767	4.69714
PO409-16R	307.835	4748.98	1.0929	17.1231	20.4254	0.0357816	22.9492	0.00444364	10.4628	0.455911	28.5821	2.98388	35.6971	8.05004	544.81	450.637	28.5821	2.98388
PO409-17C	303.451	5517.34	0.923679	24.6883	70.2626	0.0244766	70.5878	0.00438271	6.7688	0.0958919	28.191	1.90403	24.5539	17.1258	-318.646	2058.82	28.191	1.90403
PO409-18C	573.975	3554.7	1.12274	21.5945	19.4654	0.0297777	19.5561	0.00466373	1.88126	0.0961981	29.9944	0.562962	29.7943	5.742	13.6627	471.765	29.9944	0.562962
PO409-20R	224.933	3157.09	1.06964	17.938	25.494	0.0354123	26.9004	0.0046071	8.58406	0.319106	29.6311	2.53771	35.3351	9.34203	442.304	575.481	29.6311	2.53771
PO409-21C	258.335	3371.62	1.13235	22.1089	45.5463	0.0299913	45.7835	0.00480907	4.65429	0.101659	30.9269	1.43598	30.0049	13.5371	-43.1921	1161.27	30.9269	1.43598
PO409-22R	241.012	2839.27	1.56281	22.5473	40.807	0.0262514	42.5129	0.00429285	11.9222	0.280436	27.6142	3.28517	26.3114	11.0425	-91.131	1039.1	27.6142	3.28517
PO409-23C	426.859	6000.13	1.13968	24.1539	25.2654	0.0261749	25.8453	0.00458534	5.44426	0.210648	29.4914	1.60192	26.2357	6.69392	-262.815	649.559	29.4914	1.60192
PO409-24C	329.96	5756.14	1.91484	24.2441	25.5387	0.0272159	26.7569	0.00478549	7.98184	0.298309	30.7757	2.45061	27.2652	7.19838	-272.273	658.012	30.7757	2.45061
PO409-25C	249.509	4657.23	1.55203	18.1019	26.3711	0.0359828	27.7415	0.00472408	8.61131	0.310413	30.3816	2.6101	35.8943	9.78398	422.046	597.999	30.3816	2.6101
PO409-26R	1285.76	6800.17	0.499549	19.8041	8.31133	0.0304007	8.61272	0.00436654	2.25852	0.26223	28.0872	0.632975	30.4084	2.58017	217.802	192.657	28.0872	0.632975
PO409-28C	175.445	4141.86	1.11067	20.7622	77.7768	0.0310741	78.6862	0.0046792	11.9288	0.151599	30.0937	3.58144	31.0718	24.0835	107.376	2220.21	30.0937	3.58144
PO409-29C	386.023	7316.86	1.92801	22.8345	29.2719	0.0269555	30.1225	0.00446415	7.10783	0.235965	28.7137	2.03638	27.0078	8.02833	-122.277	735.748	28.7137	2.03638
PO409-30C	768.111	621.584	0.750122	18.8435	21.937	0.0302312	22.5322	0.00413158	5.1444	0.228313	26.579	1.36451	30.2414	6.71367	331.723	502.828	26.579	1.36451
PO409-31C	332.546	5126.28	1.31389	24.2982	32.2075	0.0255669	32.7488	0.00450559	5.92944	0.181058	28.9796	1.71447	25.6339	8.2899	-277.944	837.826	28.9796	1.71447
PO409-32C	168.611	2614.05	1.16708	2.05039	1596.47	0.311242	1596.5	0.00462843	8.87125	0.0055567	29.7679	2.6347	275.143	#NUM!	4204.5	645.887	29.7679	2.6347
PO409-33C	304.986	8456.51	0.75016	14.223	111.217	0.0472312	111.292	0.00487213	4.07032	0.0365735	31.3315	1.2722	46.8597	51.0086	937.398	425.164	31.3315	1.2722
PO409-34R	339.952	5310.67	1.49284	23.4412	23.7896	0.0259932	24.2395	0.00441915	4.6484	0.191769	28.4249	1.31839	26.0559	6.23554	-187.397	601.68	28.4249	1.31839
PO409-35R	675.592	7339.34	0.859468	22.6416	15.6744	0.0267273	16.3567	0.00438894	4.6748	0.285804	28.231	1.31686	26.7821	4.32342	-101.377	387.206	28.231	1.31686
Sample							Isotope ratios						Apparent ages (Ma)
PO427	U	206Pb	U/Th	206Pb*	±	207Pb*	±	206Pb*	±	error	206Pb*	±	207Pb*	±	206Pb*	±	Best age	±
14Q 98°43'58.1"O 16°57'15.9"N
	(ppm)	204Pb		207Pb*	(%)	235U*	(%)	238U	(%)	corr.	238U*	(Ma)	235U	(Ma)	207Pb*	(Ma)	(Ma)	(Ma)
PO427-1C	309.265	3274.58	1.10928	19.2305	42.857	0.0319074	44.9421	0.00445022	13.5304	0.301063	28.6243	3.8644	31.8921	14.1112	285.418	1023.66	28.6243	3.8644
PO427-2R	335.887	7473.53	1.08714	15.874	20.2234	0.0375243	23.587	0.00432014	12.1392	0.514655	27.7894	3.36615	37.404	8.66218	708.095	434.223	27.7894	3.36615
PO427-4C	361.51	24658.2	2.20836	20.4151	4.71059	0.131971	6.41363	0.0195403	4.35258	0.678645	124.75	5.37763	125.868	7.59252	147.055	110.525	124.75	5.37763
PO427-5R	433.635	14845.5	4.22381	22.5263	13.5047	0.0694401	15.2772	0.0113448	7.14255	0.467529	72.7218	5.165	68.168	10.0726	-88.8425	332.353	72.7218	5.165
PO427-7C	213.107	4756.78	3.69809	15.4843	50.8003	0.0385032	52.0401	0.00432402	11.2919	0.216985	27.8144	3.13401	38.3616	19.5935	760.709	1146.32	27.8144	3.13401
PO427-8R	641.98	12051.8	2.36006	20.7438	22.1255	0.0311828	22.5871	0.0046914	4.54319	0.201141	30.172	1.36757	31.1789	6.93548	109.427	528.031	30.172	1.36757
PO427-10C	145.892	1450.78	1.4185	2.15146	768.756	0.347868	768.962	0.00542808	17.7855	0.0231292	34.897	6.18984	303.117	#NUM!	4133.27	175.068	4133.27	175.068
PO427-13C	131.349	2203.52	1.08433	-1.97635	2348.17	-0.306762	2348.25	0.00439708	18.2181	0.00775818	28.2833	5.14139	-372.018	#NUM!	0	1074.08	28.2833	5.14139
PO427-15C	151.628	2673.12	1.1361	3.41506	399.822	0.187912	400.292	0.00465427	19.3952	0.0484526	29.9337	5.79224	174.846	758.24	3432.64	275.853	3432.64	275.853
PO427-17R	239.552	1982.09	1.13778	18.6427	48.0447	0.0322696	50.8607	0.00436316	16.6889	0.328129	28.0655	4.67364	32.2484	16.1454	355.989	1148.26	28.0655	4.67364
PO427-18C	109.675	1202.38	0.941488	13.4454	102.97	0.0456924	104.419	0.0044557	17.3313	0.165979	28.6595	4.95603	45.3666	46.3607	1051.68	291.341	28.6595	4.95603
PO427-19C	93.8299	904.527	1.09553	11.0103	204.053	0.0509635	204.703	0.00406967	16.3021	0.079638	26.1815	4.25949	50.472	101.125	1442.89	586.064	26.1815	4.25949
PO427-22C	101.122	1181.77	1.13642	-12.1052	262.572	-0.052068	263.189	0.00457132	18.0058	0.0684138	29.4014	5.2819	-54.2951	-147.824	0	116.185	29.4014	5.2819
PO427-23C	685.149	4203.35	1.60209	21.4329	25.8551	0.0286385	26.7907	0.00445173	7.01812	0.261961	28.634	2.00511	28.6704	7.5737	31.7368	628.506	28.634	2.00511
PO427-24C	342.744	10756.3	1.67375	26.6749	37.7033	0.0239206	38.2596	0.00462778	6.50083	0.169914	29.7638	1.93043	24.0026	9.07585	-521.314	1038.91	29.7638	1.93043
PO427-26C	1929.51	7861.21	0.338313	19.9845	6.39203	0.0322954	7.73055	0.00468094	4.34779	0.562417	30.1049	1.30585	32.2738	2.45571	196.782	148.658	30.1049	1.30585
PO427-29C	194.145	1988.42	0.971288	6.77865	259.919	0.0907399	260.105	0.00446108	9.84262	0.0378409	28.694	2.81796	88.1924	223.242	2317.38	144.175	2317.38	144.175
Sample							Isotope ratios						Apparent ages (Ma)
PO216	U	206Pb	U/Th	206Pb*	±	207Pb*	±	206Pb*	±	error	206Pb*	±	207Pb*	±	206Pb*	±	Best age	±
14Q 96°29'28.5"O 15°39'48.6"N
	(ppm)	204Pb		207Pb*	(%)	235U*	(%)	238U	(%)	corr.	238U*	(Ma)	235U	(Ma)	207Pb*	(Ma)	(Ma)	(Ma)
PO216-1R	307.046	1390.76	5.42807	27.15	20.6092	0.022807	24.2645	0.00449093	12.8073	0.527821	28.8856	3.69119	22.8977	5.49388	-568.758	561.324	28.8856	3.69119
PO216-3C	465.274	2294.62	1.45748	22.3694	19.8064	0.043051	20.039	0.00698453	3.04416	0.151912	44.8687	1.36113	42.7985	8.39835	-71.7403	488.024	44.8687	1.36113
PO216-4R	422.957	2288.04	1.70336	24.9882	17.3522	0.0367192	18.3239	0.00665467	5.88778	0.321317	42.7566	2.50909	36.6158	6.59	-349.712	450.722	42.7566	2.50909
PO216-5C	296.727	1845.51	1.40076	22.8464	18.3658	0.0423536	18.7245	0.00701788	3.6474	0.194793	45.0822	1.63859	42.1193	7.72543	-123.554	456.53	45.0822	1.63859
PO216-6C	175.004	1076	2.48792	24.5378	49.5481	0.0417777	50.0076	0.00743496	6.76395	0.135258	47.7516	3.21796	41.5582	20.3655	-302.977	1340.33	47.7516	3.21796
PO216-7R	452.692	2377.82	1.45373	27.7762	16.7828	0.032814	17.1335	0.00661045	3.44856	0.201276	42.4734	1.45991	32.7838	5.52735	-630.741	461.774	42.4734	1.45991
PO216-8C	485.712	1851.89	1.27526	29.5739	18.9642	0.0328196	18.9883	0.00703949	0.957326	0.0504165	45.2205	0.431392	32.7893	6.12676	-805.561	542.491	45.2205	0.431392
PO216-9C	241.243	1255.8	3.09736	20.0584	22.4625	0.0504031	22.5183	0.0073325	1.58322	0.0703081	47.0959	0.742912	49.9305	10.9719	188.194	528.557	47.0959	0.742912
PO216-10R	105.804	508.999	2.35704	17.0596	107.485	0.055052	107.505	0.00681145	2.06845	0.0192405	43.7605	0.902097	54.4144	57.018	552.932	673.668	43.7605	0.902097
PO216-11C	61.3534	390.737	3.88855	20.0126	87.4964	0.0401245	87.9271	0.00582388	8.69297	0.0988656	37.4342	3.24472	39.9456	34.4543	193.549	2723.22	37.4342	3.24472
PO216-12R	148.035	851.898	2.85987	22.3923	32.841	0.0398105	35.3239	0.00646539	13.0094	0.36829	41.5444	5.38732	39.6391	13.7331	-74.235	822.07	41.5444	5.38732
PO216-13C	293.118	1852.77	2.16635	26.5199	27.1183	0.0376697	27.14	0.00724542	1.08395	0.0399391	46.5386	0.502636	37.5464	10.0043	-505.762	733.757	46.5386	0.502636
PO216-14R	559.423	2835.12	2.1291	21.0648	12.3643	0.0439173	12.6	0.00670952	2.42591	0.192533	43.1079	1.04227	43.6414	5.38238	73.0618	294.886	43.1079	1.04227
PO216-15C	536.362	3221.04	1.25028	21.2063	15.773	0.0437549	16.0268	0.00672962	2.84093	0.177261	43.2366	1.22421	43.4835	6.82201	57.1013	378.093	43.2366	1.22421
PO216-17C	500.973	2368.55	4.13229	24.3531	23.3017	0.0390469	23.4492	0.00689669	2.62565	0.111972	44.3063	1.15934	38.8931	8.9479	-283.698	600.336	44.3063	1.15934
PO216-18C	139.556	642.492	2.51699	52.2168	98.149	0.0181753	98.1749	0.00688319	2.25402	0.0229592	44.2199	0.993313	18.2892	17.7965	-2830.76	0	44.2199	0.993313
PO216-19R	199.534	378.679	2.00692	32.542	43.1698	0.0281127	43.3461	0.00663507	3.9049	0.0900866	42.6311	1.65921	28.1513	12.0354	-1085.67	1355.48	42.6311	1.65921
PO216-20R	295.708	770.426	5.27176	34.5923	38.0743	0.0158023	38.8067	0.00396459	7.50389	0.193366	25.5068	1.91022	15.9199	6.1299	-1274.28	1236.25	25.5068	1.91022
PO216-21R	915.139	2405.16	2.74784	24.5706	10.2543	0.026853	11.9844	0.00478527	6.20279	0.517573	30.7743	1.90432	26.9064	3.18222	-306.396	262.986	30.7743	1.90432
PO216-23C	466.418	1800.98	1.50375	20.925	9.68127	0.0436101	9.94139	0.00661837	2.25924	0.227256	42.5242	0.957562	43.3426	4.21821	88.8974	229.93	42.5242	0.957562
PO216-24C	180.541	903.226	3.23216	19.1514	117.641	0.0469994	117.658	0.00652818	1.95512	0.016617	41.9466	0.817443	46.6349	53.6785	294.835	953.52	41.9466	0.817443
PO216-25C	273.458	1782.1	2.93733	26.8534	42.0263	0.0332328	42.1406	0.00647239	3.10206	0.0736121	41.5893	1.28597	33.1955	13.7634	-539.181	1171.53	41.5893	1.28597
PO216-27R	409.695	1404.13	6.95725	31.8525	24.0541	0.0196719	24.1311	0.00454452	1.9258	0.0798058	29.2295	0.561628	19.7806	4.72711	-1021.42	724.607	29.2295	0.561628
PO216-29R	133.842	438.403	6.49497	12.6107	113.352	0.0390137	118.51	0.00356826	34.5826	0.291812	22.9615	7.92656	38.8606	45.2134	1179.59	272.18	22.9615	7.92656
PO216-30C	74.0945	376.257	3.75972	18.0035	93.5951	0.0452762	93.866	0.00591189	7.12635	0.0759204	37.9983	2.69992	44.9624	41.3064	434.194	649.056	37.9983	2.69992
Sample							Isotope ratios						Apparent ages (Ma)
PO223	U	206Pb	U/Th	206Pb*	±	207Pb*	±	206Pb*	±	error	206Pb*	±	207Pb*	±	206Pb*	±	Best age	±
14Q 96°57'46.7"O 15°50'9.2"N
	(ppm)	204Pb		207Pb*	(%)	235U*	(%)	238U	(%)	corr.	238U*	(Ma)	235U	(Ma)	207Pb*	(Ma)	(Ma)	(Ma)
PO223-1R	1165.84	718.5	0.893193	21.0671	19.3291	0.0232186	19.5045	0.00354764	2.61	0.133815	22.8291	0.594785	23.3062	4.49403	72.7812	463.253	22.8291	0.594785
PO223-2C	2491.07	26911.5	13.1953	14.7495	2.26498	0.626789	3.42564	0.0670499	2.57	0.750224	418.357	10.4103	494.094	13.4025	862.392	46.9957	418.357	10.4103
PO223-3C	122.749	5244	1.56889	12.1058	2.45822	2.13018	3.13774	0.187028	1.95001	0.621469	1105.26	19.8062	1158.64	21.685	1259.89	48.0518	1259.89	48.0518
PO223-4C	334.287	319.5	1.16278	14.7171	32.2338	0.0294292	32.5408	0.00314122	4.46	0.137059	20.2179	0.900305	29.4506	9.4461	866.957	685.47	20.2179	0.900305
PO223-5R	5285.93	2005.5	1.52741	20.5545	6.61423	0.0235878	6.79342	0.00351636	1.55	0.228162	22.6282	0.350122	23.6725	1.58957	131.027	155.692	22.6282	0.350122
PO223-6R	892.729	252	1.25788	13.471	21.6251	0.0367805	22.2843	0.00359347	5.38	0.241426	23.1235	1.24182	36.6759	8.02728	1047.81	440.989	23.1235	1.24182
PO223-8R	988.064	451.5	2.4432	21.5403	17.8429	0.0218784	18.2728	0.00341795	3.94	0.215622	21.996	0.865164	21.9754	3.9724	19.7062	431.393	21.996	0.865164
PO223-10C	1728.14	979.5	0.709369	20.9138	14.5642	0.0234035	14.6812	0.00354987	1.85	0.126011	22.8434	0.421855	23.4897	3.40901	90.1207	346.708	22.8434	0.421855
PO223-11R	2376.74	744	0.891157	21.1877	13.2609	0.022452	13.6582	0.00345015	3.27	0.239417	22.2028	0.724783	22.5452	3.04534	59.192	317.262	22.2028	0.724783
PO223-12R	1348.81	735	0.793045	20.6647	28.7732	0.0230446	28.8234	0.0034538	1.7	0.0589799	22.2263	0.377196	23.1335	6.59258	118.44	690.792	22.2263	0.377196
PO223-13C	1536.88	948	1.10392	20.9829	7.8804	0.0256956	9.68492	0.00391042	5.63	0.581316	25.159	1.41369	25.7613	2.46359	82.2967	187.274	25.159	1.41369
PO223-14R	4127.87	990	1.21988	20.763	43.9951	0.0241706	44.1589	0.00363979	3.8	0.0860529	23.421	0.888383	24.2505	10.5823	107.243	1087.37	23.421	0.888383
PO223-15C	156.01	678	2.40777	17.8397	13.2363	0.321485	13.3528	0.0415956	1.76	0.131808	262.716	4.53085	283.044	32.9953	454.516	294.921	262.716	4.53085
PO223-16R	741.782	4134	4.59754	19.7848	4.40756	0.245125	4.52859	0.0351737	1.04	0.229652	222.848	2.27802	222.609	9.05274	220.061	102.023	222.848	2.27802
PO223-17C	1196.8	6037.5	10.0234	20.0964	4.24595	0.178267	5.13055	0.0259829	2.88	0.561344	165.357	4.70174	166.568	7.88187	183.783	98.9329	165.357	4.70174
PO223-18R	2101.65	6195	14.5256	20.6016	4.32312	0.153177	4.71023	0.0228872	1.87	0.397009	145.877	2.69727	144.713	6.35294	125.646	101.818	145.877	2.69727
PO223-19C	293.557	2598	6.52112	19.862	6.65005	0.250879	8.35624	0.0361399	5.06	0.605536	228.862	11.3773	227.29	17.0189	211.036	154.267	228.862	11.3773
PO223-20R	646.223	3418.5	7.2441	19.9548	7.77366	0.189394	8.57943	0.0274101	3.63	0.423105	174.319	6.24298	176.112	13.8725	200.23	180.751	174.319	6.24298
PO223-21C	707.57	345	1.36988	20.9661	21.4296	0.0221852	22.1825	0.00337349	5.73	0.258312	21.7103	1.24191	22.2802	4.88851	84.192	513.485	21.7103	1.24191
PO223-22C	1755.22	813	1.10744	21.1383	19.4855	0.0244153	19.5194	0.00374309	1.15	0.0589156	24.0845	0.276455	24.4931	4.72375	64.76	467.756	24.0845	0.276455
PO223-23C	508.76	3124.5	4.32239	20.3128	5.83112	0.21201	6.13286	0.0312339	1.9	0.309807	198.266	3.70972	195.238	10.8933	158.774	136.541	198.266	3.70972
PO223-24R	438.686	747	3.36615	19.8303	11.9715	0.0655174	14.2611	0.00942289	7.75	0.543437	60.4594	4.6637	64.4367	8.90409	214.744	278.109	60.4594	4.6637
PO223-25C	483.835	469.5	1.23928	20.8414	31.2196	0.0244682	31.3761	0.00369851	3.13	0.0997575	23.7982	0.743509	24.5455	7.60922	98.333	754.855	23.7982	0.743509
PO223-26R	789.981	598.5	1.43748	20.1705	17.2702	0.0240839	17.66	0.00352324	3.69	0.208946	22.6723	0.83514	24.1645	4.21711	175.201	405.497	22.6723	0.83514
PO223-27C	1261.4	696	1.00543	21.7103	24.9127	0.021422	25.015	0.00337307	2.26	0.0903457	21.7076	0.489767	21.5218	5.32708	0.789334	608.473	21.7076	0.489767
PO223-28R	795.1	498	1.31833	21.057	42.1582	0.0223404	42.1996	0.00341182	1.87	0.0443132	21.9565	0.409889	22.4344	9.36366	73.9211	1044.04	21.9565	0.409889
PO223-29C	141.296	1341	2.55106	19.3322	10.0649	0.309613	10.1327	0.043411	1.17001	0.115469	273.941	3.13798	273.881	24.3283	273.344	231.152	273.941	3.13798
PO223-30R	278.871	1941	7.9233	20.9009	13.8147	0.181879	14.3628	0.0275707	3.93	0.273624	175.326	6.79747	169.677	22.4466	91.5764	328.638	175.326	6.79747
PO223-31C	1323.22	29839.5	4.4383	12.7433	2.5604	1.7018	5.27331	0.157286	4.61	0.874214	941.677	40.39	1009.21	33.7387	1158.85	50.7864	1158.85	50.7864
PO223-32C	238.869	1248	2.5306	19.14	10.1452	0.187324	12.5514	0.0260037	7.39	0.588779	165.488	12.0739	174.343	20.1096	296.192	232.054	165.488	12.0739
PO223-33C	752.44	601.5	1.04195	21.083	23.7467	0.0236198	23.9183	0.00361167	2.86	0.119574	23.2404	0.663477	23.7043	5.60405	70.9875	571.702	23.2404	0.663477
PO223-40C	805.488	565.5	0.929815	20.9744	18.9205	0.0212565	19.638	0.00323355	5.26	0.267848	20.8112	1.0929	21.3573	4.15038	83.2626	452.416	20.8112	1.0929
PO223-41R	768.446	576	1.53002	21.3541	23.5034	0.0216437	24.1567	0.00335206	5.58	0.230992	21.5726	1.20174	21.7422	5.1964	40.5098	568.925	21.5726	1.20174
PO223-43R	3599.11	927	1.00994	21.2113	14.3012	0.0248677	14.5096	0.00382562	2.45	0.168854	24.6145	0.601905	24.9414	3.57482	56.5414	342.521	24.6145	0.601905
PO223-45R	979.681	555	0.800282	21.2755	19.1264	0.023327	19.2865	0.00359946	2.48	0.128588	23.1619	0.573385	23.4138	4.46406	49.3293	460.338	23.1619	0.573385
PO223-46C	2280.66	901.5	0.892978	21.4878	13.3176	0.022654	14.1227	0.0035305	4.7	0.332798	22.719	1.06591	22.7458	3.17661	25.559	320.664	22.719	1.06591
PO223-49R	1293.18	846	2.21264	21.3448	23.9868	0.0225794	24.1555	0.00349545	2.85	0.117985	22.4938	0.639957	22.6717	5.41584	41.5563	580.808	22.4938	0.639957
PO223-51C	795.337	370.5	1.03778	21.3462	27.1352	0.0220616	28.158	0.00341551	7.52	0.267065	21.9803	1.6501	22.1574	6.17157	41.3966	659.436	21.9803	1.6501
PO223-52R	1320.13	814.5	1.21491	21.3463	15.3608	0.0238274	15.9011	0.00368891	4.11	0.258472	23.7365	0.973775	23.9102	3.75759	41.3866	369.197	23.7365	0.973775
PO223-54R	650.307	478.5	1.58108	21.3089	22.835	0.0233108	22.9485	0.00360261	2.28	0.0993528	23.1822	0.527604	23.3978	5.3081	45.5831	551.841	23.1822	0.527604
PO223-55R	1117.95	762	1.06113	20.9526	14.7688	0.022473	16.5731	0.00341506	7.52	0.453748	21.9774	1.64989	22.5661	3.69866	85.7196	351.9	21.9774	1.64989
PO223-56C	1056.74	24970.5	11.2119	13.9514	2.00094	1.23611	2.59351	0.125076	1.65	0.636204	759.716	11.8249	817.118	14.5583	976.771	40.7855	759.716	11.8249
PO223-59R	1778.89	684	2.30648	21.6683	26.3939	0.0226296	26.6492	0.0035563	3.68	0.13809	22.8847	0.840665	22.7215	5.98794	5.4647	645.175	22.8847	0.840665
PO223-61C	806.386	745.5	7.82646	21.4207	33.3079	0.0271753	33.3716	0.0042219	2.06	0.0617292	27.1588	0.558294	27.2251	8.96495	33.0584	817.716	27.1588	0.558294
PO223-62C	1466.06	811.5	0.843665	20.8315	17.72	0.021882	17.7606	0.00330602	1.2	0.0675652	21.2768	0.254901	21.979	3.86167	99.4588	422.035	21.2768	0.254901
PO223-63R	1437.85	912	1.30907	20.9756	15.3917	0.0226109	15.6199	0.00343978	2.66	0.170296	22.1362	0.587813	22.703	3.50684	83.1205	367.071	22.1362	0.587813
PO223-634C	640.521	318	1.33648	21.5668	31.7461	0.0198258	32.2485	0.00310111	5.67	0.175822	19.9601	1.12999	19.9338	6.36576	16.7476	779.898	19.9601	1.12999
PO223-65R	3230.48	1254	1.082	21.1555	12.573	0.0237171	12.6311	0.00363902	1.21	0.0957952	23.4161	0.282821	23.8008	2.97136	62.8129	300.498	23.4161	0.282821
PO223-66C	903.633	514.5	1.37519	21.5558	25.1838	0.0222936	25.2445	0.00348532	1.75	0.0693219	22.4288	0.391821	22.3879	5.58992	17.9776	613.295	22.4288	0.391821
PO223-67R	1112.82	280.5	0.858699	21.3913	34.6043	0.0251647	34.6248	0.00390415	1.19	0.0343685	25.1188	0.298333	25.2356	8.6303	36.3522	850.764	25.1188	0.298333
PO223-68C	1578.06	5500.5	13.2829	20.3744	2.45241	0.131892	8.62596	0.0194896	8.27	0.958734	124.429	10.1916	125.797	10.2062	151.689	57.465	124.429	10.1916
PO223-71C	535.815	357	1.86585	21.6623	35.7871	0.0209667	36.0066	0.00329408	3.97	0.110257	21.2001	0.840261	21.0691	7.50825	6.12398	886.554	21.2001	0.840261
PO223-72R	611.554	240	1.62094	20.0173	31.6729	0.0250923	31.6887	0.00364287	1	0.0315571	23.4408	0.233983	25.1639	7.87626	192.963	753.249	23.4408	0.233983
PO223-74R	3196.04	1165.5	1.39453	20.6067	8.79166	0.0218675	9.17948	0.00326817	2.64	0.287598	21.0336	0.554383	21.9646	1.99459	125.067	207.321	21.0336	0.554383
PO223-75C	170.52	1402.5	4.07118	19.9418	13.7065	0.200382	13.9472	0.0289815	2.58	0.184984	184.171	4.68439	185.449	23.6447	201.739	319.495	184.171	4.68439
PO223-76C	765.473	363	1.70604	21.1385	30.8459	0.0216585	31.0587	0.00332049	3.63	0.116875	21.3698	0.774438	21.7569	6.68564	64.7341	750.076	21.3698	0.774438
PO223-78R	3435.57	1344	0.941661	21.1507	5.38837	0.0225878	5.9613	0.00346495	2.55	0.427759	22.2979	0.567615	22.6801	1.33704	63.3578	128.393	22.2979	0.567615
PO223-79C	2442.38	2188.5	32.4708	21.4739	13.3382	0.0255576	13.957	0.00398044	4.11	0.294475	25.6086	1.05043	25.6247	3.53171	27.1118	321.059	25.6086	1.05043
Analysis							Isotope ratios						Apparent ages (Ma)
PO219	U	206Pb	U/Th	206Pb*	±	207Pb*	±	206Pb*	±	error	206Pb*	±	207Pb*	±	206Pb*	±	Best age	±
14Q 96°29'28.5"O 15°39'50.1"N
	(ppm)	204Pb		207Pb*	(%)	235U*	(%)	238U	(%)	corr.	238U*	(Ma)	235U	(Ma)	207Pb*	(Ma)	(Ma)	(Ma)
PO219-2C	860.318	4819.18	3.64821	20.387	10.2683	0.0463657	10.3856	0.00685565	1.55624	0.149846	44.0436	0.683086	46.0201	4.6728	150.284	241.165	44.0436	0.683086
PO219-3C	54.6118	190.192	2.13056	3.23052	186.168	0.0546069	190.801	0.00127944	41.7892	0.219021	8.24251	3.44228	53.9859	100.643	3518.66	884.401	3518.66	884.401
PO219-4C	533.211	2640.71	6.69687	26.3556	20.5928	0.0242826	21.0068	0.00464158	4.14977	0.197544	29.8523	1.23594	24.3615	5.05671	-489.22	551.721	29.8523	1.23594
PO219-5C	49.63	185.645	2.25561	2.73513	170.011	0.155242	170.936	0.00307954	17.7613	0.103906	19.8215	3.51515	146.53	237.475	3773.33	1084.62	3773.33	1084.62
PO219-6R	368.108	2337.89	3.68861	22.8024	20.7112	0.0399304	20.7809	0.00660363	1.70156	0.0818807	42.4298	0.719597	39.7561	8.10222	-118.8	515.364	42.4298	0.719597
PO219-7R	114.626	333.866	1.9192	13.4628	94.897	0.0250605	97.1916	0.00244695	20.9946	0.216013	15.7548	3.30361	25.1324	24.1313	1049.07	238.708	15.7548	3.30361
PO219-8R	118.885	366.336	1.77117	10.2479	49.9617	0.0398541	51.2333	0.00296215	11.3438	0.221415	19.067	2.15974	39.6816	19.9406	1578.37	1004.14	19.067	2.15974
PO219-11C	398.131	2228.42	4.22894	24.6678	20.1698	0.0393823	20.2438	0.00704578	1.72926	0.0854217	45.2608	0.779933	39.2208	7.78852	-316.506	521.548	45.2608	0.779933
PO219-13C	166.938	516.622	3.38879	8.62093	74.3323	0.056174	74.5321	0.00351227	5.45355	0.0731704	22.6019	1.23045	55.4936	40.2718	1895.4	1634.08	1895.4	1634.08
PO219-15R	130.156	418.556	1.42326	19.0256	109.834	0.0207687	110.992	0.0028658	15.9928	0.144089	18.4477	2.94608	20.8722	22.934	309.883	875.984	18.4477	2.94608
PO219-17R	333.037	1191.06	1.72878	14.9607	128.655	0.0313563	128.713	0.00340232	3.8589	0.0299806	21.8955	0.843493	31.3496	39.7549	832.85	619.611	21.8955	0.843493
PO219-18C	417.999	1530.08	3.76895	35.0978	41.078	0.0230121	41.1461	0.0058578	2.3669	0.0575242	37.6516	0.888579	23.1013	9.39823	-1320.29	1354.83	37.6516	0.888579
PO219-19R	51.4825	187.573	2.3114	9.84518	164.621	0.0358947	165.361	0.00256302	15.6334	0.0945412	16.5011	2.5764	35.8079	58.2443	1653.04	229.289	16.5011	2.5764
PO219-22C	78.8609	362.001	2.44653	4.22728	165.637	0.0805066	166.759	0.00246826	19.3142	0.115821	15.8918	3.0656	78.6211	126.816	3096.96	702.646	3096.96	702.646
PO219-24C	536.89	2131.7	4.11895	20.8896	10.6096	0.0451491	11.0292	0.00684036	3.01329	0.273209	43.9457	1.3197	44.8389	4.83782	92.8616	251.889	43.9457	1.3197
PO219-25C	80.7874	324.175	2.32217	8.5514	110.952	0.0526869	112.071	0.00326767	15.7974	0.140959	21.0304	3.31684	52.1357	57.0139	1909.95	214.883	1909.95	214.883
PO219-27R	262.476	946.622	1.62388	29.3594	41.8393	0.0168045	41.9614	0.00357826	3.19901	0.076237	23.0258	0.735284	16.9212	7.04166	-784.929	1227.28	23.0258	0.735284
PO219-28C	230.836	1489.64	1.01411	19.7334	28.1482	0.0458791	28.2369	0.00656622	2.23598	0.0791865	42.1902	0.940286	45.5478	12.5777	226.081	662.178	42.1902	0.940286
PO219-30R	237.276	939.137	5.19377	40.5979	102.681	0.0103445	106.479	0.00304586	28.1822	0.264675	19.605	5.51673	10.4496	11.07	-1811.64	0	19.605	5.51673
PO219-31C	279.317	1585.03	2.34976	48.3972	80.2831	0.0183876	80.3003	0.00645423	1.66153	0.0206914	41.473	0.686874	18.5009	14.7228	-2495	855.354	41.473	0.686874
PO219-35R	426.697	2290.18	6.8073	27.4149	34.7987	0.0333351	35.3516	0.00662807	6.22776	0.176167	42.5863	2.64343	33.296	11.5802	-595.054	969.008	42.5863	2.64343
PO219-36R	135.945	437.327	0.774967	17.5697	75.832	0.0253314	76.5692	0.00322791	10.5995	0.138431	20.7749	2.1985	25.4007	19.2101	488.309	2010.52	20.7749	2.1985
PO219-37C	1010.51	3727.44	3.42842	24.3196	13.9955	0.0339704	14.0657	0.00599177	1.40315	0.0997568	38.5102	0.538745	33.92	4.69231	-280.185	357.719	38.5102	0.538745
PO219-38R	221.767	655.421	9.85274	24.9097	40.0597	0.0246439	40.3799	0.00445222	5.07494	0.12568	28.6371	1.45009	24.7196	9.86155	-341.596	1069.14	28.6371	1.45009
PO219-40R	350.274	1186.93	1.69742	9.31345	306.327	0.0499712	306.341	0.00337543	2.94903	0.00962663	21.7228	0.639534	49.5129	149.102	1755.26	783.667	21.7228	0.639534
C=core
R=rim

## Sheet: SF3 and SF4
SF3. Structural data of the Xolapa-Acatlán complexes close to the boundary between those blocks in Tlayolapa-La Venta region, northwestern Xolapa Complex. a), b), and c) Poles to the mylonitic foliation Ss, with inserts of rose diagrams representing the strikes of Ss; d), e), and f) data of the stretching lineation Ls, inserts of rose diagrams trends. Lower hemisphere, equal-area net.
SF4. Structural data of the Xolapa-Acatlán complexes close to the boundary between thoese blocks in San Luis Acatlán and Acalmani region, central Xolapa Complex. a), b), and c) Poles to the mylonitic foliation Ss, with inserts of rose diagrams representing the strikes of Ss; d), e), and f) data of the stretching lineation Ls, inserts of rose diagrams trends. Lower hemisphere projection, equal-are…
